# Supplementary material for: Identification and quantification of anthropogenic nanomaterials in urban rain and runoff using single particle-inductively coupled plasma-time of flight-mass spectrometry
Source: Royal Society of Chemistry journal article supplement (doi:10.1039/d1en00850a), 2022-01-01
Supplement: d1en00850a1.pdf [file d1en00850a1.pdf]

**Supporting Information for**

**Identification and Quantification of Anthropogenic Nanomaterials in Urban Rain and Runoff Using Single Particle-Inductively Coupled Plasma-Time of Flight-Mass Spectrometry**

Jingjing Wang<sup>a</sup>, MD Nabi<sup>a</sup>, Mahdi Erfani<sup>b</sup>, Erfan Goharian<sup>b</sup>, and Mohammed Baalousha<sup>a\*</sup>

**Affiliations:**

<sup>a</sup> Center for Environmental Nanoscience and Risk, Department of Environmental Health Sciences, Arnold School of Public Health, University of South Carolina, SC 29208, USA

<sup>b</sup> Department of Civil and Environmental Engineering, University of South Carolina, SC 29208, USA

\* Corresponding author

**1. Sampling**

**Table S1.** Parameters of the sampling.

| Sampling site  | Date          | Sample #    | Sample type | Time of sampling | Approximate sample volume (mL) |
|----------------|---------------|-------------|-------------|------------------|--------------------------------|
| Quail Ln       | Oct. 19, 2019 | QL1         | Run-off     | 12:00 - 12:30 pm | 800                            |
|                |               | QL2         | Run-off     | 12:30 – 12:35 pm | 1000                           |
|                |               | QL3         | Run-off     | 12:45 – 12:50 pm | 900                            |
|                |               | QL4         | Run-off     | 1:00 – 1:05 pm   | 800                            |
|                |               | QL5         | Run-off     | 1:15 – 1:20 pm   | 600                            |
|                |               | QL6         | Run-off     | 1:30 – 1:35 pm   | 800                            |
|                |               | QL7         | Run-off     | 2:00 – 2:05 pm   | 300                            |
|                |               | QL8         | Run-off     | 2:30 – 2:35 pm   | 900                            |
|                |               | QL9         | Run-off     | 3:00 – 3:05 pm   | 1000                           |
|                |               | QL10        | Run-off     | 3:30 – 3:35 pm   | 1000                           |
|                |               | QL11        | Run-off     | 4: 30 – 4:35 pm  | 100                            |
|                |               | QL12        | Run-off     | 5:30 – 5:35 pm   | 500                            |
|                |               | QL13/R      | Rain        | 10:33 – 17:45    | 150                            |
| Blossom Street | May 18, 2020  | BSR1        | Rain 1      | 14:05-16:15      | 200                            |
|                |               | BSR2        | Rain 2      | 17:25-18:35      | <150                           |
|                |               | BS1         | Run-off     | 14:25-14:30      | 1000                           |
|                |               | BS2         | Run-off     | 14:40-14:45      | 1500                           |
|                |               | BS3         | Run-off     | 14:55-15:00      | 1200                           |
|                |               | BS4         | Run-off     | 15:10-15:15      | 800                            |
|                |               | BS5         | Run-off     | 15:25-15:30      | 900                            |
|                |               | BS6         | Run-off     | 15:40-15:45      | 1000                           |
|                |               | BS7         | Run-off     | 15:55- 16:00     | 600                            |
|                |               | BS8         | Run-off     | 16:10 -16:15     | <100                           |
|                |               | BS9         | Run-off     | 17:30 -17:35     | 900                            |
|                |               | BS10        | Run-off     | 17:45-17:50      | 700                            |
|                |               | BS11        | Run-off     | 18:00-18:05      | 700                            |
| BS12           | Run-off       | 18:15-18:20 | 800         |                  |                                |
| BS13           | Run-off       | 18:30-18:35 | 1000        |                  |                                |

## 2. Total digestion for elemental analysis

Samples were shaken vigorously for 30 s before any portion was transferred into acid-washed bottles. The bottles were capped and set in the fume hood for 5 min to bring the stored sample up to room temperature before preparing for digestion. All digestion procedure was performed on Teflon covered hotplates in boxes equipped with double-HEPA filtered forced air in a metal-free air clean lab. 10 mL aliquots of rainwater or runoff were transferred into 15 mL Teflon vessels (Savillex, Eden Prairie, MN, United States). Then the samples were dried at 110 °C and treated with 1 mL 30% trace metal grade H<sub>2</sub>O<sub>2</sub> (Fisher Chemical, Fair Lawn, NJ, United States) at 70 °C for 2 h to remove organic matters. The liquid was then evaporated at 100 °C before the solid residue was digested with 2 mL HF and HNO<sub>3</sub> mixture (HF:HNO<sub>3</sub> = 3:1, both acids were ACS grade acids distilled in the air clean lab for mixing) at 110 °C for 48 h. HF was removed from samples by evaporating acid mixture at the end of the digestion. But due to the possibility of insoluble fluoride salts formed during digestion, 1 mL of distilled concentrated HNO<sub>3</sub> was added to the samples to react with fluoride salts and left to evaporate at 110 °C. The process was repeated at least 2 times for complete reaction. The samples were weight after drying and then mixed with 5 mL of 1% trace metal grade HNO<sub>3</sub> (Fisher Chemical, Fair Lawn, NJ, United States). The mixture was bath sonicated for 10 min (Branson, 2800, 40kHz, Danbury, CT, United States) and left on hotplates at 50 °C for 2 h for full dissolution before transferring to 15 mL acid-washed polypropylene centrifuge tubes (Fisher Scientific, San Nicolás de los Garza, Nuevo León, Mexico) and storing at 4 °C.

Prior to ICP-MS analysis, the samples were set in the fume hood for 5 min to bring up to room temperature. Then the samples were centrifuged (Eppendorf, 5810 R, Hamburg, Germany) at 3100 g for 5 min to remove any undigested minerals. The centrifugal size cut-off is 500 nm, 350 nm, and 300 nm for NNMs, TiO<sub>2</sub> particles, and Fe<sub>2</sub>O<sub>3</sub> particles, respectively.

The digestion protocol has been applied for the digestion of different types of samples including sewage spills, stormwaters, surface waters, wastewater treatment plant liquid samples<sup>1-4</sup>. The efficiency (recovery >98%), precision (2-3%), and accuracy (*e.g.*, better than 5% for most elements) of the digestion protocol has been validated in previous studies<sup>1</sup>.

## 3. Particle extraction for SP-ICP-TOF-MS analysis

### 3.1. Liquid samples (rainwater and runoff)

Samples were shaken vigorously for 30 s before an aliquot was poured into acid-washed bottle. The bottle was capped and set in the fume hood for 5 min to bring up the stored sample temperature to room temperature. An aliquot of 10 mL sample was then pipetted into an acid-washed 15-mL centrifuge tube. Triplicate were prepared for each collected sample. After vortex for 10 s, all the prepared samples were bath sonicated for 2 h. The bath temperature was monitored and adjusted to maintain sonication under 40 °C. Centrifugation was applied to all samples afterwards, at 775 x g for 5 min. Top 7 mL of the 10 mL sample was collected as 1 μm particle fraction according to Stokes' Law calculation and an assumed NNMs density of 2.5 g cm<sup>-3</sup>. The supernatant was transferred into another acid-washed 15-mL centrifuge tube and stored at 4 °C prior to analysis.

### 3.2. Solid samples (soil)

A portion of a sample stored in freezer was poured into an acid-washed 50-mL centrifuge tube. The tube was capped and left in the fume hood to reach room temperature. 20 mg of the room temperature sieved soil sample was measured into an acid-washed 50-mL centrifuge tube, and 30 mL of UPW was added to the tube. After vortex for 10 s, the mixture was placed in a tube rotator (Fisher Scientific, Shanghai, China) and stirred at 40 rpm for 20 h. Similar to liquid samples, the mixture was sonicated for 2 h, and then centrifuged to separate the 1 μm fraction for further analysis.

## 4. Elemental analysis by ICP-MS

**Table S2.** Operating conditions for inductively coupled plasma-mass spectrometer analysis (Perkin Elmer NexION 350D).

| <b>Instrument Parameter</b> | <b>Value</b>    |
|-----------------------------|-----------------|
| Nebulizer Gas Flow          | 0.85 to 1 L/min |
| Auxiliary Gas Flow          | 1.02 L/min      |
| Plasma Gas Flow             | 16 L/min        |
| ICP RF Power                | 1600 W          |
| Analog Stage Voltage        | -1600 V         |
| Pulse Stage Voltage         | 1600 V          |
| Discriminator Threshold     | 12              |
| Deflector Voltage           | -9.5 V          |
| Dwell time                  | 50 ms           |
| Sample Flow Rate            | 0.3 mL/min      |

**Table S3.** Operating conditions for inductively coupled plasma-time of flight-mass spectrometer analysis (TOFWERK icpTOF R).

| <b>Instrument Parameter</b> | <b>Value</b>              |
|-----------------------------|---------------------------|
| Nebulizer Gas Flow          | 1.10-1.14 L/min           |
| Auxiliary Gas Flow          | 0.8 L/min                 |
| Plasma Gas Flow             | 14 L/min                  |
| ICP RF Power                | 1550 W                    |
| Collision Cell Gas          | Helium with 4.5% Hydrogen |
| Collision Cell Gas Flow     | 5.0 mL/min                |
| Integration Time            | 2 ms                      |
| Sample Flow Rate            | 0.4 mL/min                |
| Transport Efficiency        | 5-7%                      |
| Detected mass range         | 14-275 amu                |
| TOF repetition rate         | 33 kHz                    |
| TOF time resolution         | 30 $\mu$ s                |

**Table S4.** Elements monitored for single particle-inductively coupled plasma-time of flight-mass spectrometer analysis and the corresponding particle mass and size detection limits.

| Element | Isotope           | Particle detection limit (particles per 200s analysis) | Particle number concentration detection limit (particles/mL) | Mass detection limit (g) | Size detection limit (nm, assuming pure metallic particle) | Size detection limit (nm, assuming pure metal oxide particle) | Metal oxide form                |
|---------|-------------------|--------------------------------------------------------|--------------------------------------------------------------|--------------------------|------------------------------------------------------------|---------------------------------------------------------------|---------------------------------|
| Al      | <sup>27</sup> Al  | 26                                                     | 296                                                          | 4.94 × 10 <sup>-15</sup> | 152                                                        | 165                                                           | Al <sub>2</sub> O <sub>3</sub>  |
| Si      | <sup>28</sup> Si  | 64                                                     | 725                                                          | 3.53 × 10 <sup>-14</sup> | 307                                                        | 379                                                           | SiO <sub>2</sub>                |
| Ti      | <sup>48</sup> Ti  | 26                                                     | 298                                                          | 5.05 × 10 <sup>-16</sup> | 60                                                         | 72                                                            | TiO <sub>2</sub>                |
| V       | <sup>51</sup> V   | 52                                                     | 590                                                          | 2.34 × 10 <sup>-16</sup> | 42                                                         | 62                                                            | V <sub>2</sub> O <sub>5</sub>   |
| Cr      | <sup>52</sup> Cr  | 45                                                     | 510                                                          | 2.03 × 10 <sup>-16</sup> | 38                                                         | 48                                                            | Cr <sub>2</sub> O <sub>3</sub>  |
| Mn      | <sup>55</sup> Mn  | 32                                                     | 362                                                          | 1.75 × 10 <sup>-16</sup> | 36                                                         | 47                                                            | MnO <sub>2</sub>                |
| Fe      | <sup>56</sup> Fe  | 186                                                    | 2120                                                         | 3.57 × 10 <sup>-16</sup> | 44                                                         | 57                                                            | Fe <sub>2</sub> O <sub>3</sub>  |
| Co      | <sup>59</sup> Co  | 26                                                     | 293                                                          | 1.07 × 10 <sup>-16</sup> | 28                                                         | 36                                                            | Co <sub>3</sub> O <sub>4</sub>  |
| Ni      | <sup>60</sup> Ni  | 14                                                     | 160                                                          | 5.02 × 10 <sup>-16</sup> | 48                                                         | 57                                                            | NiO                             |
| Cu      | <sup>65</sup> Cu  | 17                                                     | 193                                                          | 4.22 × 10 <sup>-16</sup> | 45                                                         | 54                                                            | CuO                             |
| Zn      | <sup>66</sup> Zn  | 36                                                     | 410                                                          | 1.31 × 10 <sup>-15</sup> | 71                                                         | 82                                                            | ZnO                             |
| Zr      | <sup>90</sup> Zr  | 5                                                      | 60                                                           | 1.42 × 10 <sup>-16</sup> | 35                                                         | 40                                                            | ZrO <sub>2</sub>                |
| Nb      | <sup>93</sup> Nb  | 4                                                      | 45                                                           | 7.50 × 10 <sup>-17</sup> | 26                                                         | 35                                                            | Nb <sub>2</sub> O <sub>5</sub>  |
| Sn      | <sup>120</sup> Sn | 13                                                     | 151                                                          | 1.34 × 10 <sup>-16</sup> | 33                                                         | 36                                                            | SnO <sub>2</sub>                |
| Sb      | <sup>121</sup> Sb | 5                                                      | 63                                                           | 1.77 × 10 <sup>-16</sup> | 37                                                         | 43                                                            | Sb <sub>2</sub> O <sub>3</sub>  |
| Ba      | <sup>138</sup> Ba | 13                                                     | 143                                                          | 6.22 × 10 <sup>-17</sup> | 32                                                         | 29                                                            | BaO                             |
| La      | <sup>139</sup> La | 4                                                      | 47                                                           | 3.16 × 10 <sup>-17</sup> | 21                                                         | 22                                                            | La <sub>2</sub> O <sub>3</sub>  |
| Ce      | <sup>140</sup> Ce | 5                                                      | 62                                                           | 3.41 × 10 <sup>-17</sup> | 21                                                         | 22                                                            | CeO <sub>2</sub>                |
| Pr      | <sup>141</sup> Pr | 5                                                      | 57                                                           | 2.52 × 10 <sup>-17</sup> | 19                                                         | 21                                                            | Pr <sub>6</sub> O <sub>11</sub> |
| Nd      | <sup>142</sup> Nd | 3                                                      | 33                                                           | 6.85 × 10 <sup>-17</sup> | 27                                                         | 28                                                            | Nd <sub>2</sub> O <sub>3</sub>  |
| Sm      | <sup>152</sup> Sm | 3                                                      | 35                                                           | 7.94 × 10 <sup>-17</sup> | 27                                                         | 28                                                            | Sm <sub>2</sub> O <sub>3</sub>  |
| Eu      | <sup>153</sup> Eu | 3                                                      | 40                                                           | 3.87 × 10 <sup>-17</sup> | 24                                                         | 23                                                            | Eu <sub>2</sub> O <sub>3</sub>  |
| Gd      | <sup>158</sup> Gd | 4                                                      | 50                                                           | 8.66 × 10 <sup>-17</sup> | 28                                                         | 30                                                            | Gd <sub>2</sub> O <sub>3</sub>  |
| Tb      | <sup>159</sup> Tb | 4                                                      | 42                                                           | 2.41 × 10 <sup>-17</sup> | 18                                                         | 20                                                            | Tb <sub>4</sub> O <sub>7</sub>  |
| Dy      | <sup>164</sup> Dy | 3                                                      | 38                                                           | 6.46 × 10 <sup>-17</sup> | 24                                                         | 26                                                            | Dy <sub>2</sub> O <sub>3</sub>  |
| Ho      | <sup>165</sup> Ho | 1                                                      | 13                                                           | 1.89 × 10 <sup>-17</sup> | 16                                                         | 17                                                            | Ho <sub>2</sub> O <sub>3</sub>  |
| Er      | <sup>166</sup> Er | 3                                                      | 29                                                           | 5.63 × 10 <sup>-17</sup> | 23                                                         | 24                                                            | Er <sub>2</sub> O <sub>3</sub>  |
| Tm      | <sup>169</sup> Tm | 6                                                      | 67                                                           | 2.15 × 10 <sup>-17</sup> | 16                                                         | 18                                                            | Tm <sub>2</sub> O <sub>3</sub>  |
| Yb      | <sup>174</sup> Yb | 2                                                      | 27                                                           | 5.55 × 10 <sup>-17</sup> | 25                                                         | 24                                                            | Yb <sub>2</sub> O <sub>3</sub>  |
| Lu      | <sup>175</sup> Lu | 5                                                      | 62                                                           | 1.67 × 10 <sup>-17</sup> | 15                                                         | 16                                                            | Lu <sub>2</sub> O <sub>3</sub>  |
| Hf      | <sup>180</sup> Hf | 3                                                      | 33                                                           | 5.45 × 10 <sup>-17</sup> | 20                                                         | 23                                                            | HfO <sub>2</sub>                |
| Ta      | <sup>181</sup> Ta | 5                                                      | 57                                                           | 2.55 × 10 <sup>-17</sup> | 14                                                         | 19                                                            | Ta <sub>2</sub> O <sub>5</sub>  |
| W       | <sup>184</sup> W  | 6                                                      | 64                                                           | 9.14 × 10 <sup>-17</sup> | 21                                                         | 26                                                            | WO <sub>2</sub>                 |
| Pb      | <sup>208</sup> Pb | 8                                                      | 91                                                           | 4.35 × 10 <sup>-17</sup> | 19                                                         | 21                                                            | PbO                             |
| Th      | <sup>232</sup> Th | 2                                                      | 26                                                           | 1.87 × 10 <sup>-17</sup> | 15                                                         | 16                                                            | ThO <sub>2</sub>                |
| U       | <sup>238</sup> U  | 2                                                      | 26                                                           | 1.81 × 10 <sup>-17</sup> | 12                                                         | 15                                                            | UO <sub>2</sub>                 |

Number concentration detection limit = mean + standard deviation of the number concentration in three blank replicates

Mass concentration detection limit = minimum detectable mass

Size detection limit= calculated minimum detectable particle size assuming pure phase

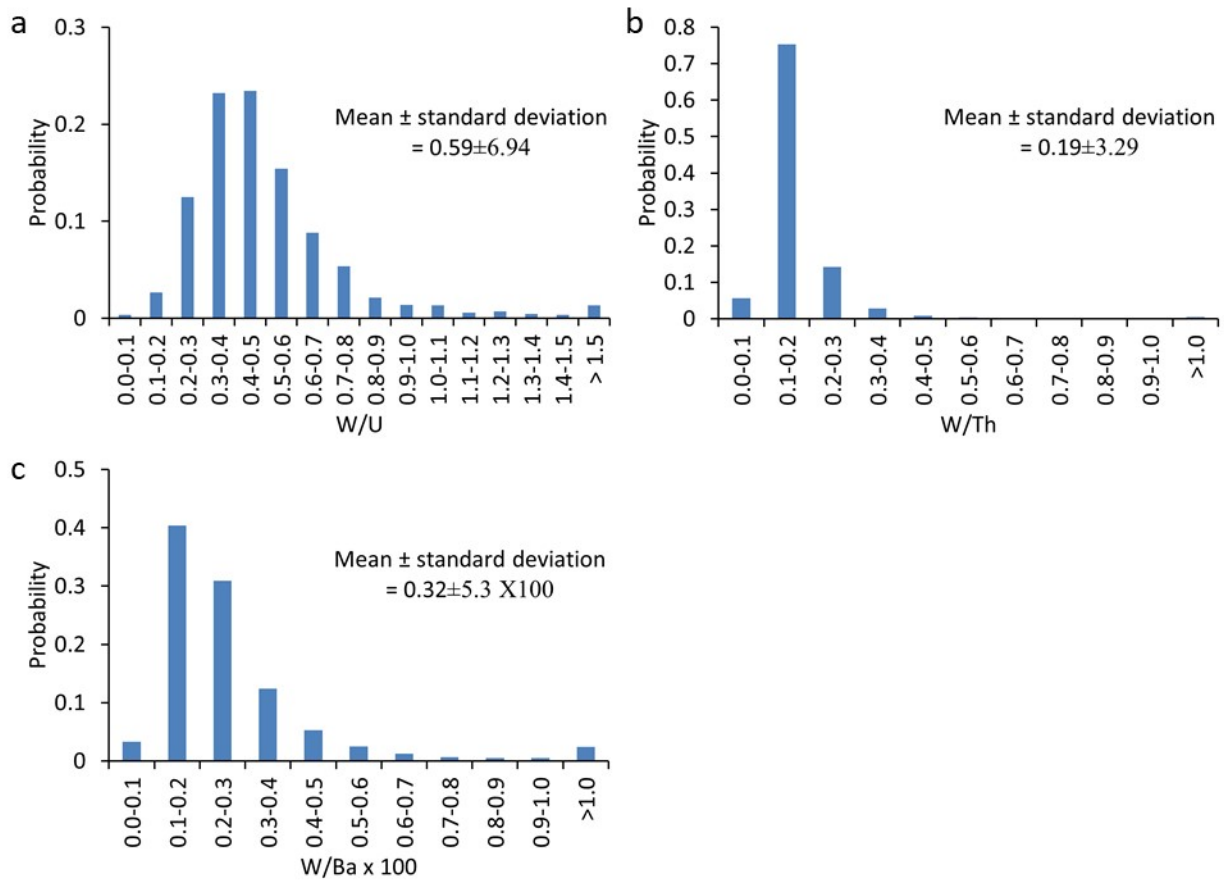

**Figure S1.** Elemental ratio distribution of W/U, W/Th, and W/Ba in a spatially balanced array of 4857 soil samples across the Conterminous United States. Elemental concentration data were obtained from the United State Geological Survey (USGS) publication <sup>5</sup>.

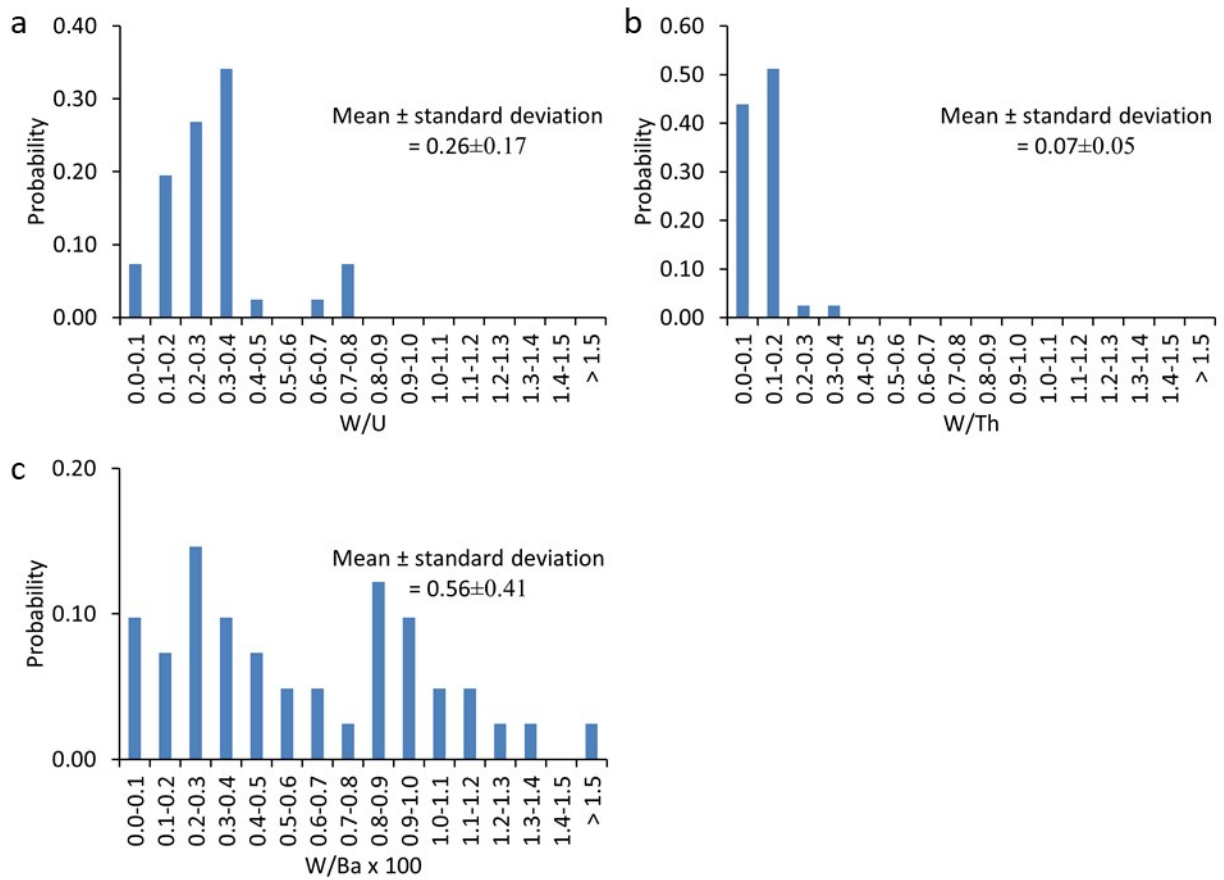

**Figure S2.** Elemental ratio distribution of W/U, W/Th, and W/Ba in a spatially balanced array of 41 soil samples across South Carolina, United States. Elemental concentration data were obtained from the United State Geological Survey (USGS) publication <sup>5</sup>.

**Table S5.** Mean metal concentrations ( $\mu\text{g L}^{-1}$ ) in rain and runoff in Blossom Street (heat map is provided in Figure S3a).

|      | Al    | Ti   | V   | Cr  | Mn   | Fe    | Co  | Ni  | Cu   | Zn    | Y    | Zr  | Nb   | Mo  | Sn   | Sb  | Ba    | La  | Ce   | Pr   | Nd   | Sm    | Eu    | Gd    | Tb    | Dy    | Ho    | Er    | Tm    | Yb    | Lu    | Hf    | Ta    | W    | Pb   | Th   | U     |
|------|-------|------|-----|-----|------|-------|-----|-----|------|-------|------|-----|------|-----|------|-----|-------|-----|------|------|------|-------|-------|-------|-------|-------|-------|-------|-------|-------|-------|-------|-------|------|------|------|-------|
| R1   | 179.2 | 10.9 | 0.4 | 1.1 | 6.6  | 112.7 | 0.1 | 1.1 | 1.4  | 15.5  | 0.06 | 0.4 | 0.11 | 0.1 | 42.0 | 0.4 | 4.2   | 0.1 | 0.19 | 0.02 | 0.09 | 0.017 | 0.005 | 0.023 | 0.003 | 0.011 | 0.003 | 0.008 | 0.001 | 0.007 |       | 0.026 | 0.037 | 0.80 | 0.40 | 0.04 | 0.012 |
| R2   | 559.5 | 28.4 | 0.7 | 2.1 | 15.1 | 316.4 | 0.2 | 1.5 | 6.8  | 70.6  | 0.16 | 1.2 | 0.14 | 0.1 | 42.0 | 0.6 | 9.1   | 0.3 | 0.69 | 0.08 | 0.29 | 0.053 | 0.012 | 0.073 | 0.008 | 0.032 | 0.007 | 0.020 | 0.003 | 0.018 | 0.003 | 0.057 | 0.029 | 0.41 | 1.04 | 0.10 | 0.031 |
| BS1  | 856.3 | 80.3 | 2.0 | 5.1 | 20.0 | 489.8 | 0.7 | 5.7 | 64.1 | 160.5 | 0.61 | 2.2 | 0.18 | 6.5 | 43.7 | 5.1 | 171.9 | 0.7 | 1.30 | 0.21 | 0.67 | 0.185 | 0.070 | 0.175 | 0.023 | 0.096 | 0.022 | 0.065 | 0.011 | 0.062 | 0.012 | 0.113 | 0.051 | 0.70 | 2.27 | 0.21 | 0.180 |
| BS2  | 540.0 | 87.7 | 3.4 | 2.1 | 4.9  | 259.1 | 0.3 | 2.9 | 30.2 | 87.6  | 0.23 | 1.1 | 0.10 | 5.6 | 42.9 | 3.4 | 95.7  | 0.4 | 0.67 | 0.10 | 0.31 | 0.090 | 0.037 | 0.081 | 0.010 | 0.039 | 0.009 | 0.026 | 0.005 | 0.024 | 0.005 | 0.074 | 0.029 | 0.55 | 1.15 | 0.11 | 0.087 |
| BS3  | 331.0 | 34.3 | 3.2 | 1.6 | 4.2  | 174.3 | 0.2 | 2.6 | 22.0 | 64.8  | 0.16 | 0.8 | 0.07 | 4.4 | 43.2 | 3.0 | 68.0  | 0.3 | 0.47 | 0.07 | 0.22 | 0.064 | 0.027 | 0.058 | 0.007 | 0.028 | 0.006 | 0.019 | 0.003 | 0.017 |       | 0.047 | 0.024 | 0.46 | 0.68 | 0.07 | 0.071 |
| BS4  | 408.5 | 33.7 | 3.1 | 2.0 | 3.9  | 225.2 | 0.2 | 2.3 | 20.8 | 63.0  | 0.16 | 0.9 | 0.08 | 4.1 | 42.8 | 3.2 | 64.5  | 0.3 | 0.50 | 0.08 | 0.23 | 0.064 | 0.026 | 0.060 | 0.007 | 0.028 | 0.006 | 0.019 | 0.004 | 0.017 |       | 0.050 | 0.023 | 0.47 | 0.79 | 0.08 | 0.070 |
| BS5  | 508.1 | 43.5 | 2.9 | 2.1 | 4.9  | 261.5 | 0.2 | 2.5 | 21.9 | 65.0  | 0.18 | 0.9 | 0.09 | 4.3 | 43.7 | 3.7 | 71.7  | 0.4 | 0.60 | 0.09 | 0.27 | 0.073 | 0.029 | 0.070 | 0.008 | 0.032 | 0.007 | 0.021 | 0.004 | 0.019 |       | 0.049 | 0.021 | 0.52 | 0.95 | 0.09 | 0.071 |
| BS6  | 575.2 | 51.8 | 2.9 | 2.1 | 4.3  | 294.4 | 0.3 | 2.4 | 22.1 | 68.8  | 0.19 | 1.1 | 0.10 | 4.6 | 42.4 | 4.1 | 74.5  | 0.4 | 0.65 | 0.10 | 0.29 | 0.077 | 0.030 | 0.074 | 0.009 | 0.034 | 0.008 | 0.022 | 0.004 | 0.020 | 0.004 | 0.057 | 0.019 | 0.49 | 1.09 | 0.10 | 0.073 |
| BS7  | 535.3 | 48.6 | 3.1 | 2.0 | 4.2  | 269.7 | 0.3 | 2.4 | 22.0 | 68.0  | 0.19 | 0.9 | 0.10 | 5.1 | 41.8 | 4.6 | 83.4  | 0.4 | 0.61 | 0.09 | 0.28 | 0.079 | 0.032 | 0.071 | 0.009 | 0.033 | 0.008 | 0.022 | 0.004 | 0.020 | 0.004 | 0.046 | 0.017 | 0.50 | 1.04 | 0.09 | 0.072 |
| BS8  | 257.9 | 24.6 | 2.9 | 1.5 | 3.5  | 140.3 | 0.2 | 2.5 | 21.2 | 58.0  | 0.14 | 0.5 | 0.06 | 5.3 | 40.3 | 4.7 | 86.4  | 0.2 | 0.37 | 0.07 | 0.19 | 0.064 | 0.030 | 0.049 | 0.007 | 0.024 | 0.006 | 0.017 | 0.003 | 0.015 |       | 0.054 | 0.016 | 0.52 | 0.69 | 0.05 | 0.071 |
| BS9  | 613.0 | 62.0 | 2.9 | 1.9 | 7.4  | 300.8 | 0.3 | 2.4 | 22.0 | 67.2  | 0.22 | 1.0 | 0.11 | 4.1 | 41.6 | 4.5 | 93.9  | 0.4 | 0.69 | 0.10 | 0.32 | 0.088 | 0.036 | 0.082 | 0.010 | 0.039 | 0.009 | 0.025 | 0.004 | 0.023 | 0.005 | 0.060 | 0.019 | 0.35 | 1.07 | 0.10 | 0.095 |
| BS10 | 190.2 | 18.5 | 2.3 | 1.3 | 2.2  | 98.1  | 0.2 | 2.0 | 16.9 | 52.1  | 0.11 | 0.4 | 0.04 | 3.7 | 42.9 | 3.5 | 71.5  | 0.2 | 0.28 | 0.05 | 0.14 | 0.053 | 0.025 | 0.038 |       | 0.020 | 0.005 | 0.014 | 0.003 | 0.013 | 0.004 | 0.027 | 0.011 | 0.27 | 0.44 | 0.04 | 0.063 |
| BS11 | 220.1 | 18.4 | 2.5 | 1.7 | 2.2  | 116.4 | 0.2 | 1.8 | 14.7 | 45.4  | 0.11 | 0.5 | 0.04 | 3.3 | 42.6 | 3.0 | 58.4  | 0.2 | 0.30 | 0.05 | 0.15 | 0.048 | 0.021 | 0.038 |       | 0.019 | 0.004 | 0.013 |       | 0.012 |       | 0.031 | 0.010 | 0.33 | 0.47 | 0.04 | 0.060 |
| BS12 | 187.3 | 16.1 | 2.1 | 1.9 | 1.7  | 96.2  | 0.1 | 1.8 | 13.6 | 42.2  |      | 0.4 | 0.04 | 3.1 | 42.7 | 3.0 | 52.9  | 0.2 | 0.24 | 0.04 | 0.12 | 0.042 | 0.019 | 0.032 |       | 0.016 |       |       |       | 0.010 |       | 0.025 | 0.010 | 0.33 | 0.40 | 0.03 | 0.049 |
| BS13 | 218.2 | 22.1 | 2.3 | 1.9 | 1.9  | 121.4 | 0.2 | 1.7 | 14.5 | 45.4  | 0.10 | 0.5 | 0.04 | 3.2 | 45.9 | 3.2 | 57.8  | 0.2 | 0.28 | 0.05 | 0.14 | 0.047 | 0.021 | 0.037 |       | 0.018 | 0.004 | 0.013 | 0.002 | 0.012 |       | 0.025 | 0.009 | 0.27 | 0.48 | 0.04 | 0.051 |

\* R1, and R2 refer to rain samples.

**Table S6.** Mean metal concentrations ( $\mu\text{g L}^{-1}$ ) in rain and runoff in Quail Lane (heat map is provided in Figure S3b)

|      | Al     | Ti    | V   | Cr  | Mn   | Fe    | Co  | Ni  | Cu  | Zn   | Y    | Zr  | Nb  | Mo  | Sn   | Sb | Ba   | La  | Ce  | Pr   | Nd   | Sm    | Eu    | Gd    | Tb    | Dy    | Ho    | Er    | Tm    | Yb    | Lu    | Hf    | Ta    | W    | Pb   | Th   | U    |
|------|--------|-------|-----|-----|------|-------|-----|-----|-----|------|------|-----|-----|-----|------|----|------|-----|-----|------|------|-------|-------|-------|-------|-------|-------|-------|-------|-------|-------|-------|-------|------|------|------|------|
| R    | 32.5   | 2.3   | 0.1 | 0.3 | 1.5  | 13.4  | 0.0 | 0.5 | 1.6 | 8.5  | 0.01 | 0.1 | 0.0 | 0.1 | 21.2 |    | 1.6  | 0.0 | 0.0 | 0.00 | 0.01 | 0.002 | 0.001 | 0.002 | 0.000 | 0.002 | 0.000 | 0.001 | 0.000 | 0.001 | 0.000 | 0.003 | 0.003 | 0.02 | 0.18 | 0.00 | 0.00 |
| QL1  | 2135.3 | 106.6 | 4.3 | 2.9 | 25.9 | 717.1 | 0.8 | 1.9 | 9.9 | 47.9 | 0.58 | 2.7 | 0.4 | 0.9 | 34.2 |    | 17.4 | 1.2 | 2.3 | 0.27 | 0.97 | 0.176 | 0.036 | 0.180 | 0.022 | 0.112 | 0.021 | 0.063 | 0.008 | 0.053 | 0.008 | 0.087 | 0.034 | 0.50 | 1.53 | 0.35 | 0.46 |
| QL2  | 1452.7 | 66.8  | 3.3 | 1.8 | 15.4 | 485.6 | 0.5 | 1.3 | 5.8 | 27.4 | 0.31 | 1.3 | 0.2 | 0.6 | 25.3 |    | 10.3 | 0.7 | 1.3 | 0.16 | 0.56 | 0.103 | 0.022 | 0.104 | 0.013 | 0.067 | 0.013 | 0.038 | 0.005 | 0.030 | 0.004 | 0.044 | 0.019 | 0.38 | 0.90 | 0.21 | 0.21 |
| QL3  | 985.4  | 42.0  | 3.0 | 1.3 | 10.3 | 365.9 | 0.3 | 0.9 | 3.9 | 17.6 | 0.24 | 0.9 | 0.1 | 0.4 | 24.4 |    | 6.6  | 0.4 | 0.8 | 0.10 | 0.35 | 0.066 | 0.015 | 0.067 | 0.009 | 0.045 | 0.009 | 0.026 | 0.003 | 0.022 | 0.003 | 0.035 | 0.013 | 0.28 | 0.48 | 0.13 | 0.14 |
| QL4  | 644.3  | 28.3  | 3.0 | 1.0 | 7.7  | 248.6 | 0.3 | 0.8 | 3.4 | 11.5 | 0.16 | 0.6 | 0.1 | 0.4 | 29.0 |    | 5.3  | 0.3 | 0.6 | 0.06 | 0.23 | 0.044 | 0.012 | 0.046 | 0.006 | 0.032 | 0.006 | 0.017 | 0.002 | 0.015 | 0.002 | 0.020 | 0.012 | 0.27 | 0.34 | 0.09 | 0.10 |
| QL5  | 575.5  | 20.8  | 2.8 | 0.9 | 7.4  | 236.5 | 0.2 | 0.8 | 3.5 | 8.5  | 0.11 | 0.3 | 0.0 | 0.3 | 31.8 |    | 4.5  | 0.2 | 0.4 | 0.04 | 0.15 | 0.030 | 0.007 | 0.030 | 0.004 | 0.020 | 0.004 | 0.011 | 0.002 | 0.010 | 0.002 | 0.012 | 0.006 | 0.24 | 0.22 | 0.05 | 0.08 |
| QL6  | 549.4  | 18.7  | 3.2 | 0.9 | 6.6  | 216.3 | 0.2 | 0.7 | 3.6 | 8.4  | 0.11 | 0.4 | 0.0 | 0.3 | 32.9 |    | 4.0  | 0.2 | 0.3 | 0.04 | 0.15 | 0.027 | 0.006 | 0.028 | 0.004 | 0.019 | 0.004 | 0.011 | 0.002 | 0.009 | 0.002 | 0.013 | 0.006 | 0.24 | 0.23 | 0.04 | 0.09 |
| QL7  | 382.1  | 12.8  | 3.0 | 0.9 | 5.2  | 155.4 | 0.2 | 0.7 | 3.8 | 7.2  | 0.08 | 0.3 | 0.0 | 0.4 | 35.8 |    | 4.1  | 0.1 | 0.2 | 0.03 | 0.10 | 0.019 | 0.005 | 0.020 | 0.003 | 0.014 | 0.003 | 0.008 | 0.001 | 0.007 | 0.001 | 0.010 | 0.006 | 0.27 | 0.28 | 0.03 | 0.08 |
| QL8  | 332.2  | 10.6  | 2.5 | 1.1 | 5.7  | 160.4 | 0.2 | 1.0 | 4.3 | 8.4  | 0.09 | 0.2 | 0.0 | 0.5 | 36.0 |    | 5.6  | 0.1 | 0.2 | 0.03 | 0.10 | 0.020 | 0.005 | 0.020 | 0.003 | 0.014 | 0.003 | 0.008 | 0.001 | 0.007 | 0.001 | 0.008 | 0.003 | 0.32 | 0.21 | 0.03 | 0.10 |
| QL9  | 274.9  | 8.7   | 2.8 | 0.6 | 1.9  | 53.8  | 0.1 | 0.4 | 1.7 | 3.8  | 0.05 | 0.2 | 0.0 | 0.3 | 42.2 |    | 2.6  | 0.1 | 0.1 | 0.02 | 0.09 | 0.016 | 0.005 | 0.017 | 0.005 | 0.011 | 0.004 | 0.008 | 0.003 | 0.006 | 0.004 | 0.009 | 0.020 | 0.22 | 0.10 | 0.02 | 0.04 |
| QL10 | 281.4  | 12.1  | 3.2 | 0.6 | 1.8  | 52.7  | 0.1 | 0.5 | 1.9 | 5.8  | 0.05 | 0.2 | 0.0 | 0.2 | 47.2 |    | 3.0  | 0.1 | 0.1 | 0.02 | 0.07 | 0.012 | 0.003 | 0.013 |       | 0.008 |       |       | 0.005 |       | 0.008 | 0.016 | 0.18  | 0.09 | 0.02 | 0.05 |      |
| QL11 | 265.4  | 8.0   | 2.4 | 1.2 | 2.8  | 52.7  | 0.3 | 0.7 | 3.6 | 7.3  | 0.07 | 0.2 | 0.0 | 0.5 | 53.7 |    | 7.2  | 0.1 | 0.1 | 0.02 | 0.07 | 0.014 | 0.005 | 0.014 |       | 0.009 | 0.002 | 0.006 | 0.001 | 0.005 |       | 0.008 | 0.012 | 0.21 | 0.12 | 0.01 | 0.19 |
| QL12 | 1176.7 | 35.0  | 2.6 | 1.4 | 3.8  | 289.4 | 0.3 | 1.1 | 4.2 | 9.3  | 1.41 | 0.5 | 0.1 | 0.4 | 53.3 |    | 7.6  | 0.2 | 0.3 | 0.04 | 0.21 | 0.054 | 0.009 | 0.125 | 0.034 | 0.214 | 0.039 | 0.097 | 0.013 | 0.073 | 0.010 | 0.019 | 0.013 | 0.20 | 0.26 | 0.06 | 0.30 |

\* R refers to rain samples.

\*\* Sb was not measured in Quail Lane samples.



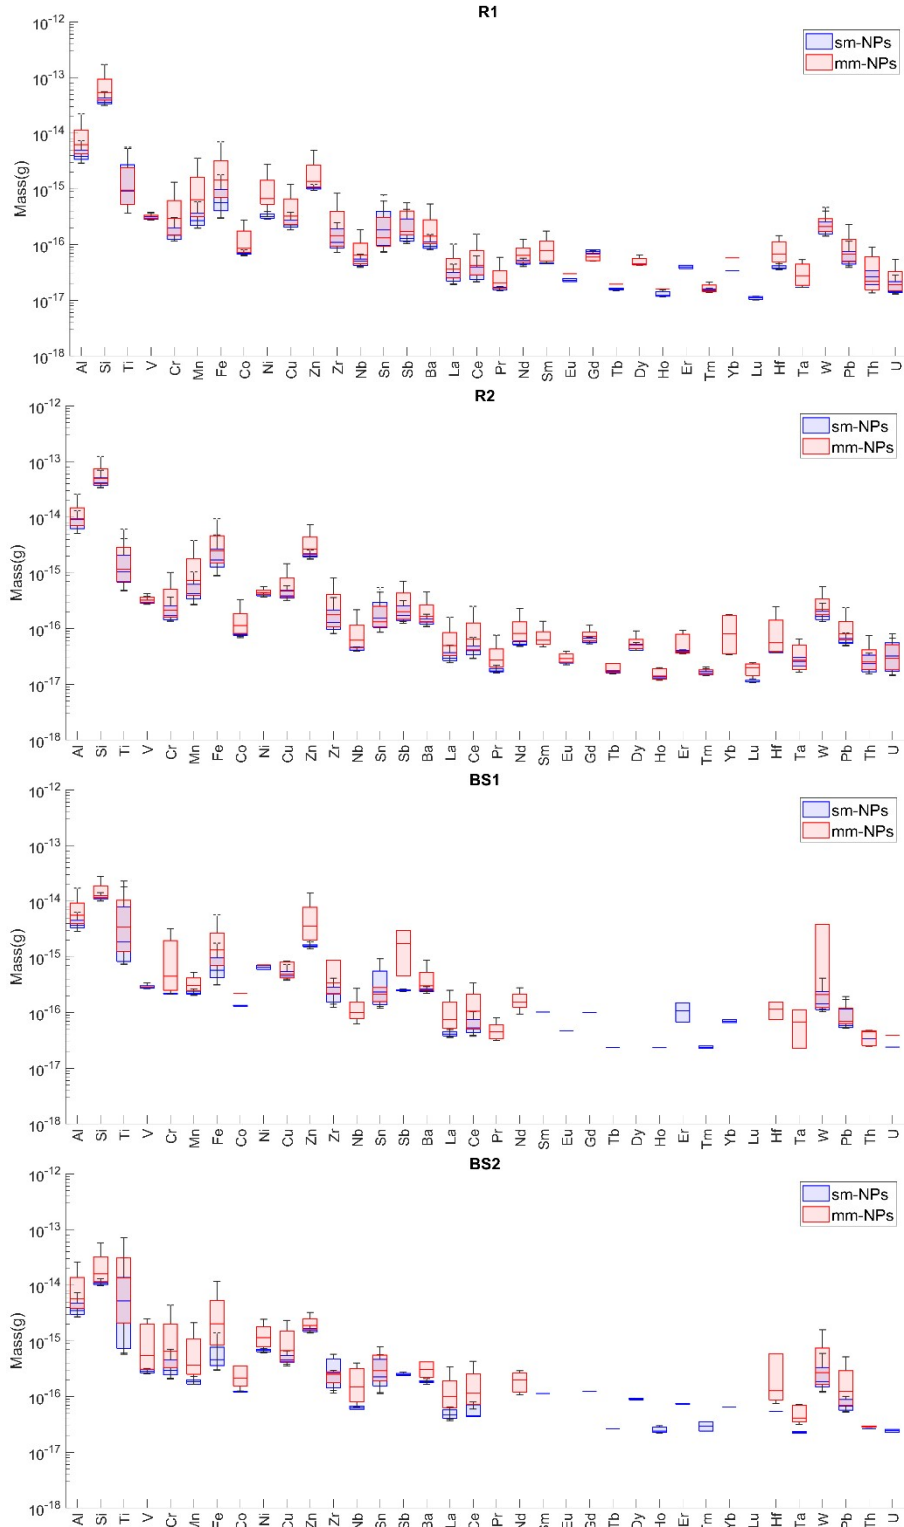

**Figure S3.** Mass distribution of single metal nanoparticles (smNPs) and multi metal nanoparticles (mmNMs) in representative samples of Blossom Street rain and runoff. R1 and R2 refer to rain samples number 1 and 2. BS1 and BS2 refer to Blossom Street bridge runoff samples number 1 and 2, which were collected at the beginning of the rain event.

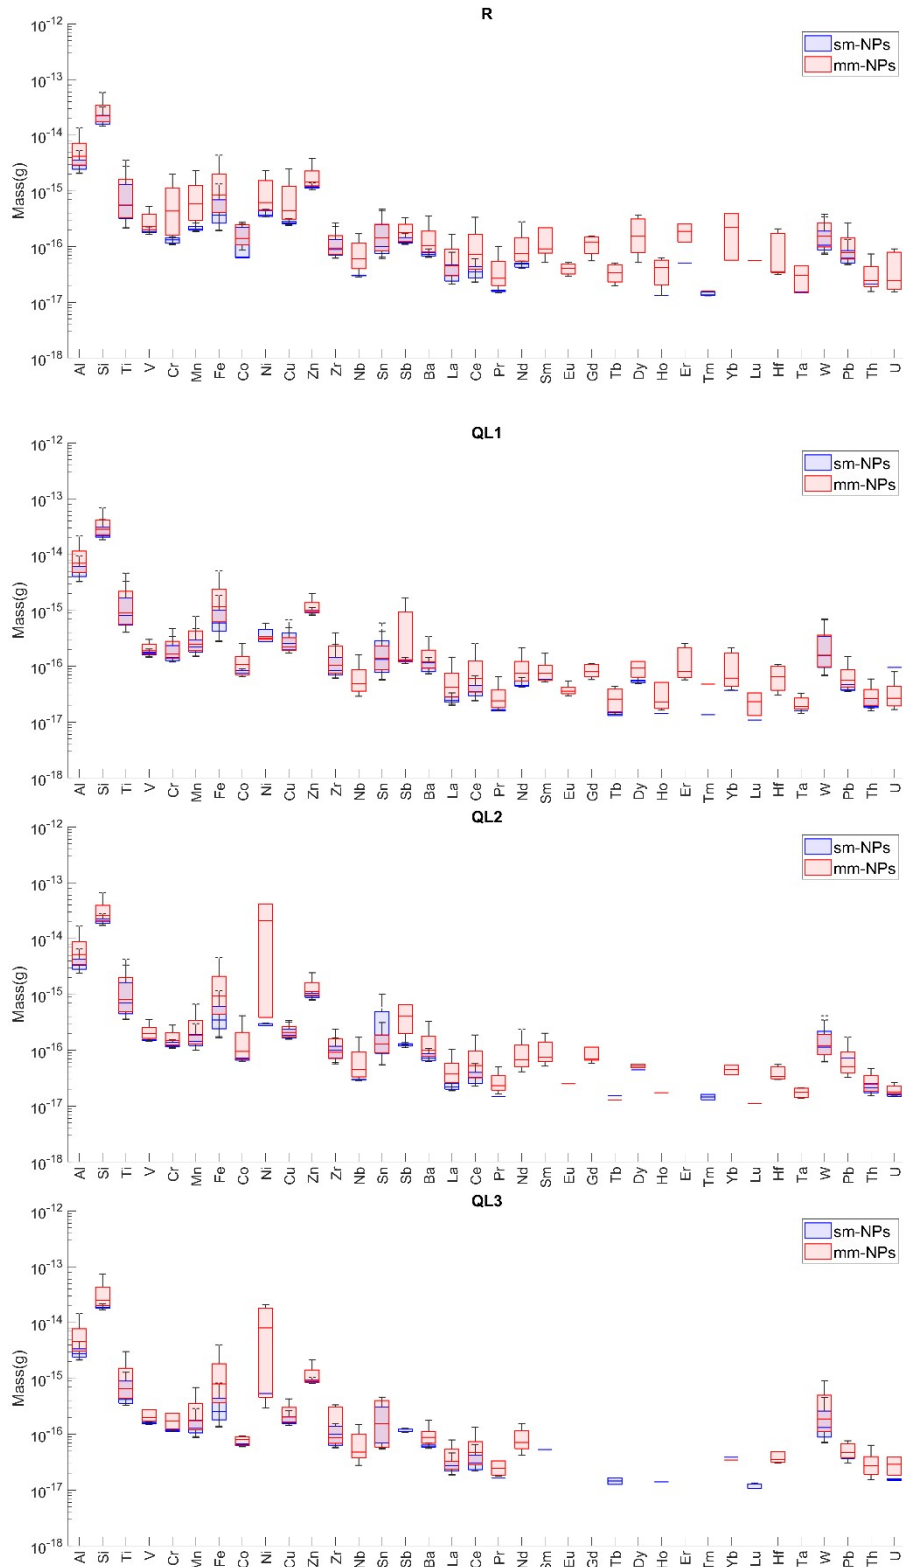

**Figure S4.** Mass distribution of single metal nanoparticles (smNPs) and multi metal nanoparticles (mmNMs) in representative samples of Quail Lane rain and runoff. R refer to rain sample and QL1, 2, and 3 refer to Quail Lane bridge runoff samples number 1, 2, and 3, which were collected in the first hour of storm event.

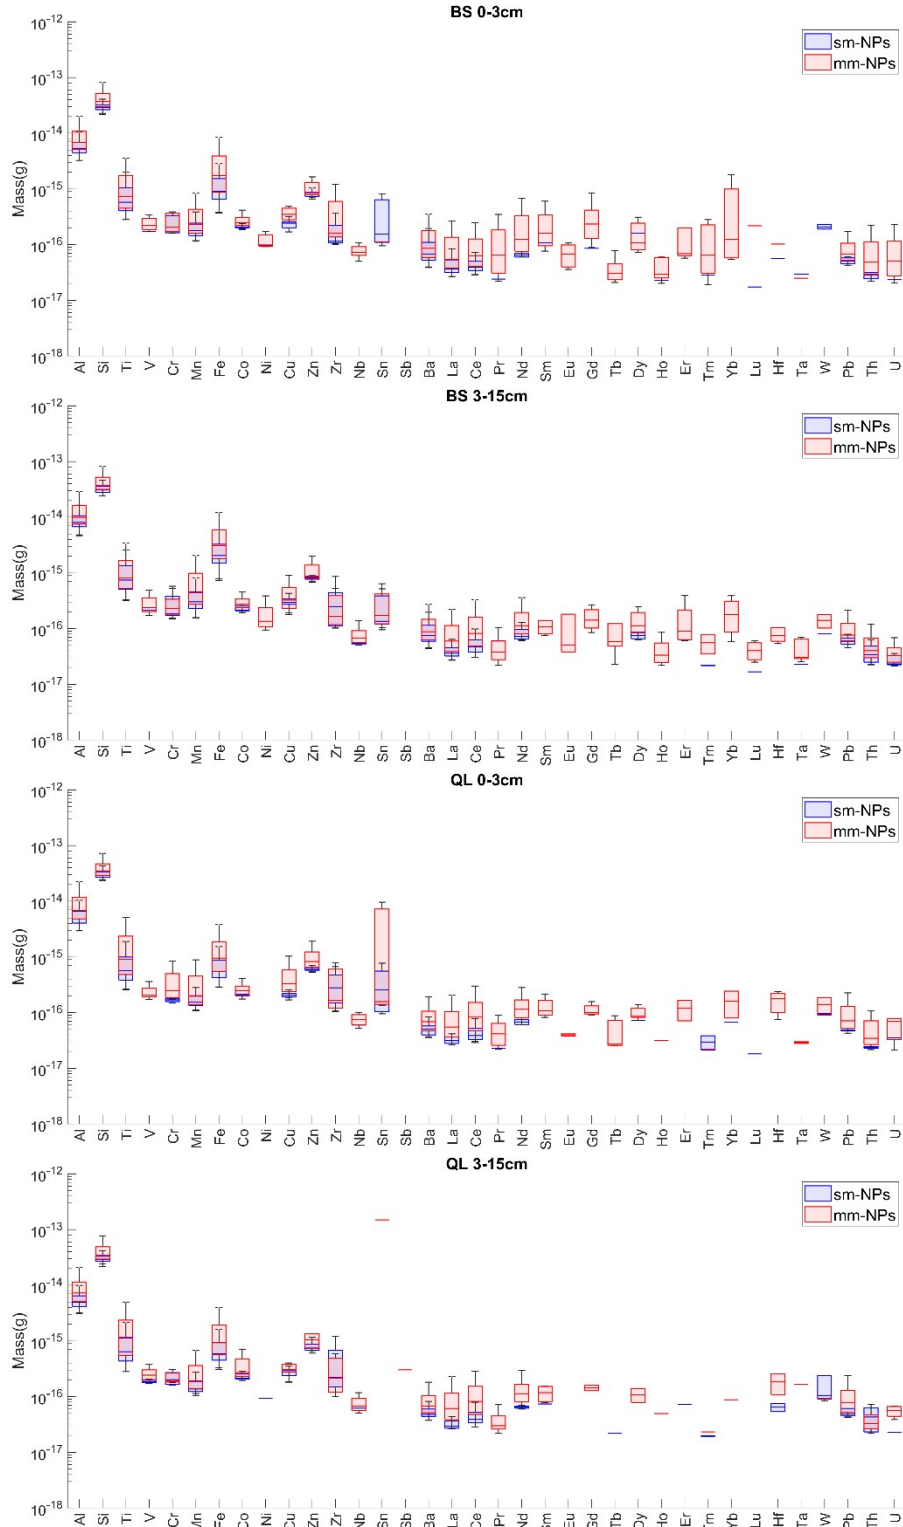

**Figure S5.** Mass distribution of single metal nanoparticles (smNPs) and multi metal nanoparticles (mmNMs) in soil samples collected at Blossom Street and Quail Lane. BS: Blossom Street, QL: Quail Lane, 0-3 cm and 3-15 cm refer to soil sampling depth.

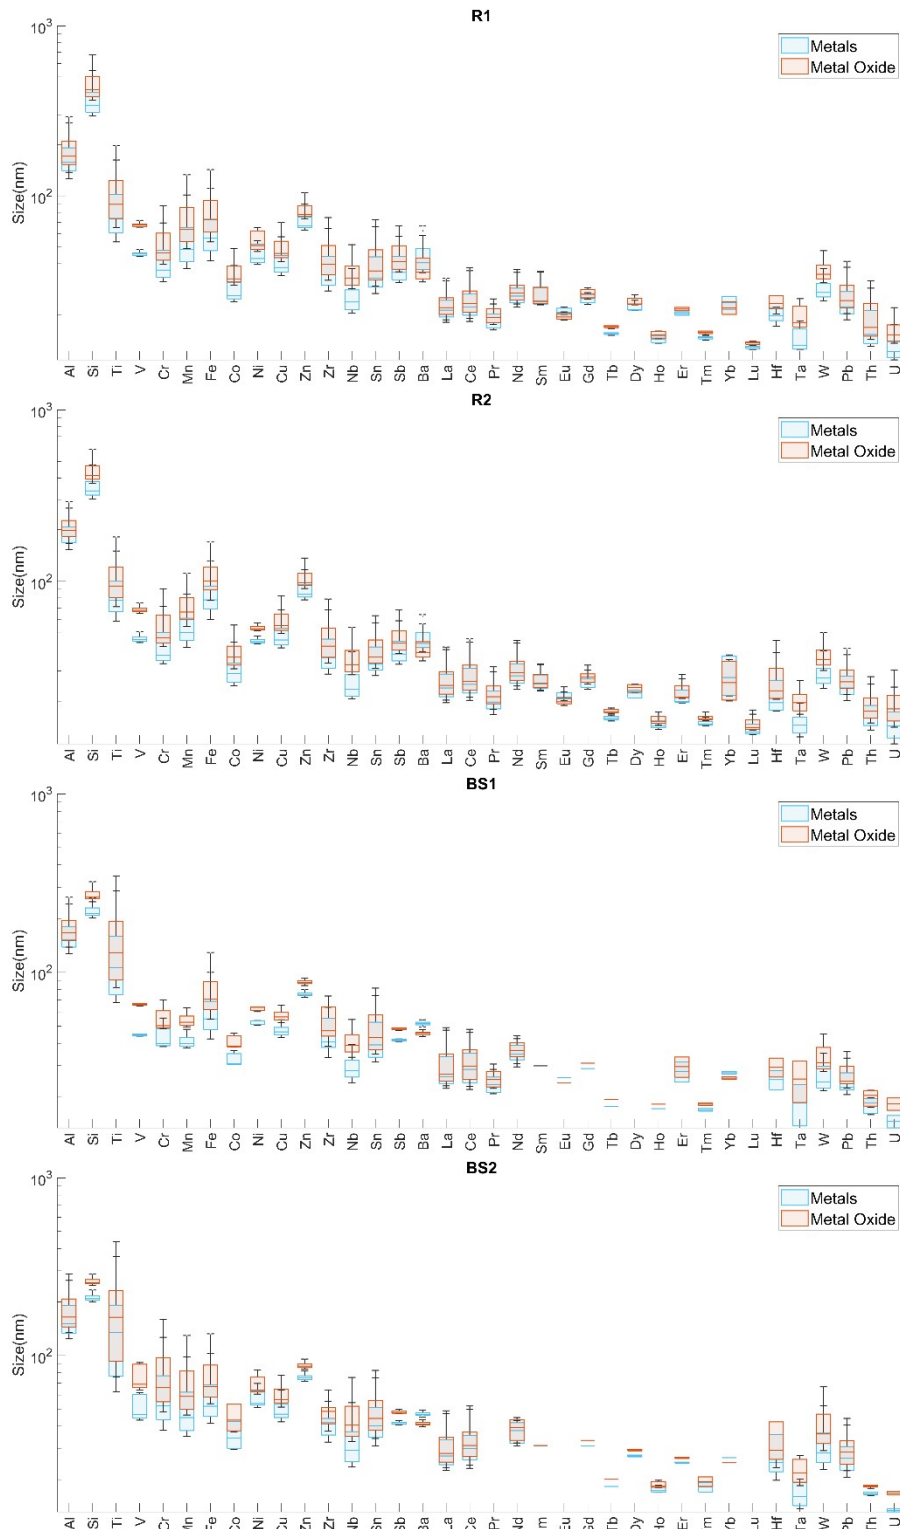

**Figure S6.** Particle size distribution of the detected NMs assuming pure metal and metal oxide composition (see Table S4) in representative samples of Blossom Street rain and runoff. R1 and R2 refer to rain samples number 1 and 2. BS1 and BS2 refer to Blossom Street bridge runoff samples number 1 and 2, which were collected at the beginning of the rain event.

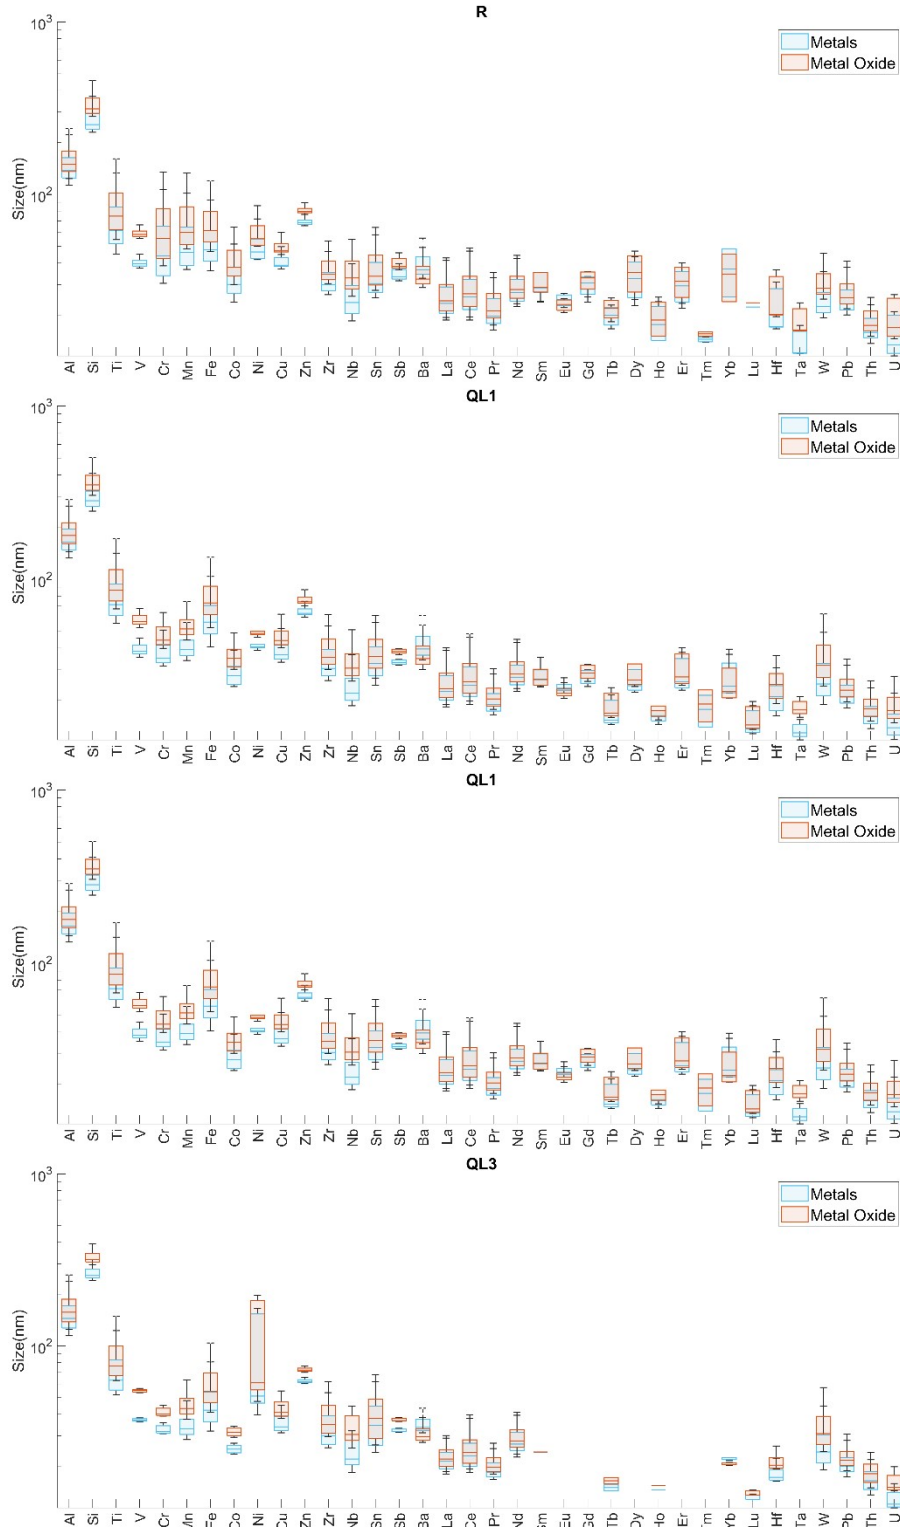

**Figure S7.** Particle size distribution of the detected NMs assuming pure metal and metal oxide composition (see Table S4) in representative samples of Quail Lane rain and runoff. R refer to rain sample and QL1, 2, and 3 refer to Quail Lane bridge runoff samples number 1, 2, and 3, which were collected in the first hour of storm event.

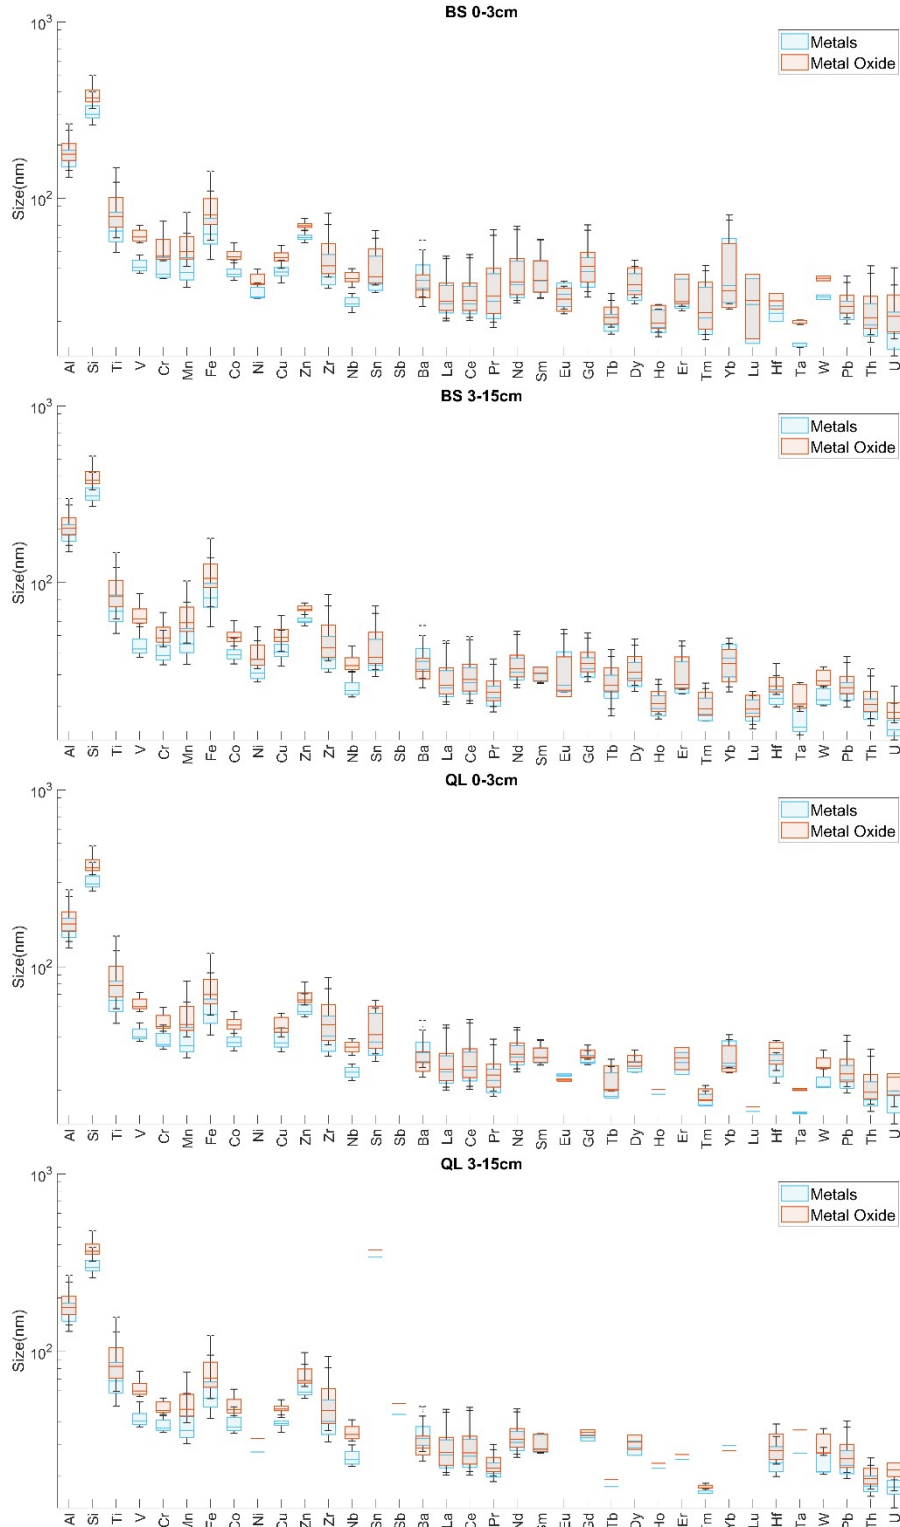

**Figure S8.** Particle size distribution of the detected NMs assuming pure metal and metal oxide composition (see Table S4) in soil samples collected at Blossom Street and Quail Lane. BS: Blossom Street, QL: Quail Lane, 0-3 cm and 3-15 cm refer to soil sampling depth.

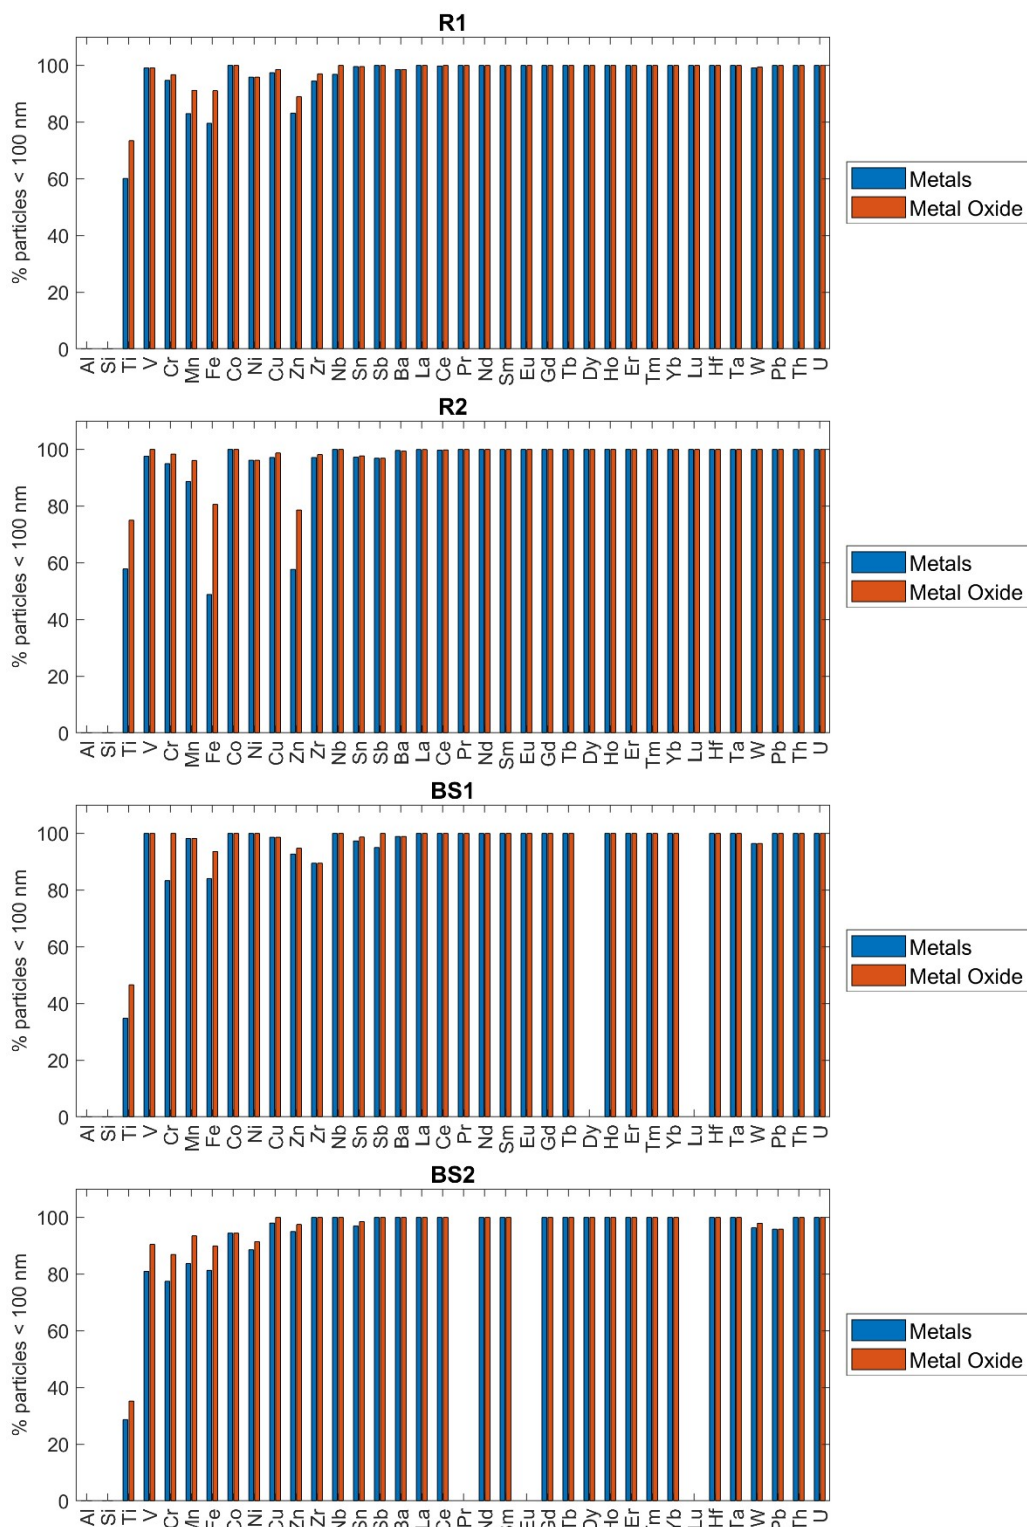

**Figure S9.** Percentage of particles within the nanosize range assuming pure metal and metal oxide composition (see Table S4) in representative samples of Blossom Street rain and runoff. R1 and R2 refer to rain samples number 1 and 2. BS1 and BS2 refer to Blossom Street bridge runoff samples number 1 and 2, which were collected at the beginning of the rain event.

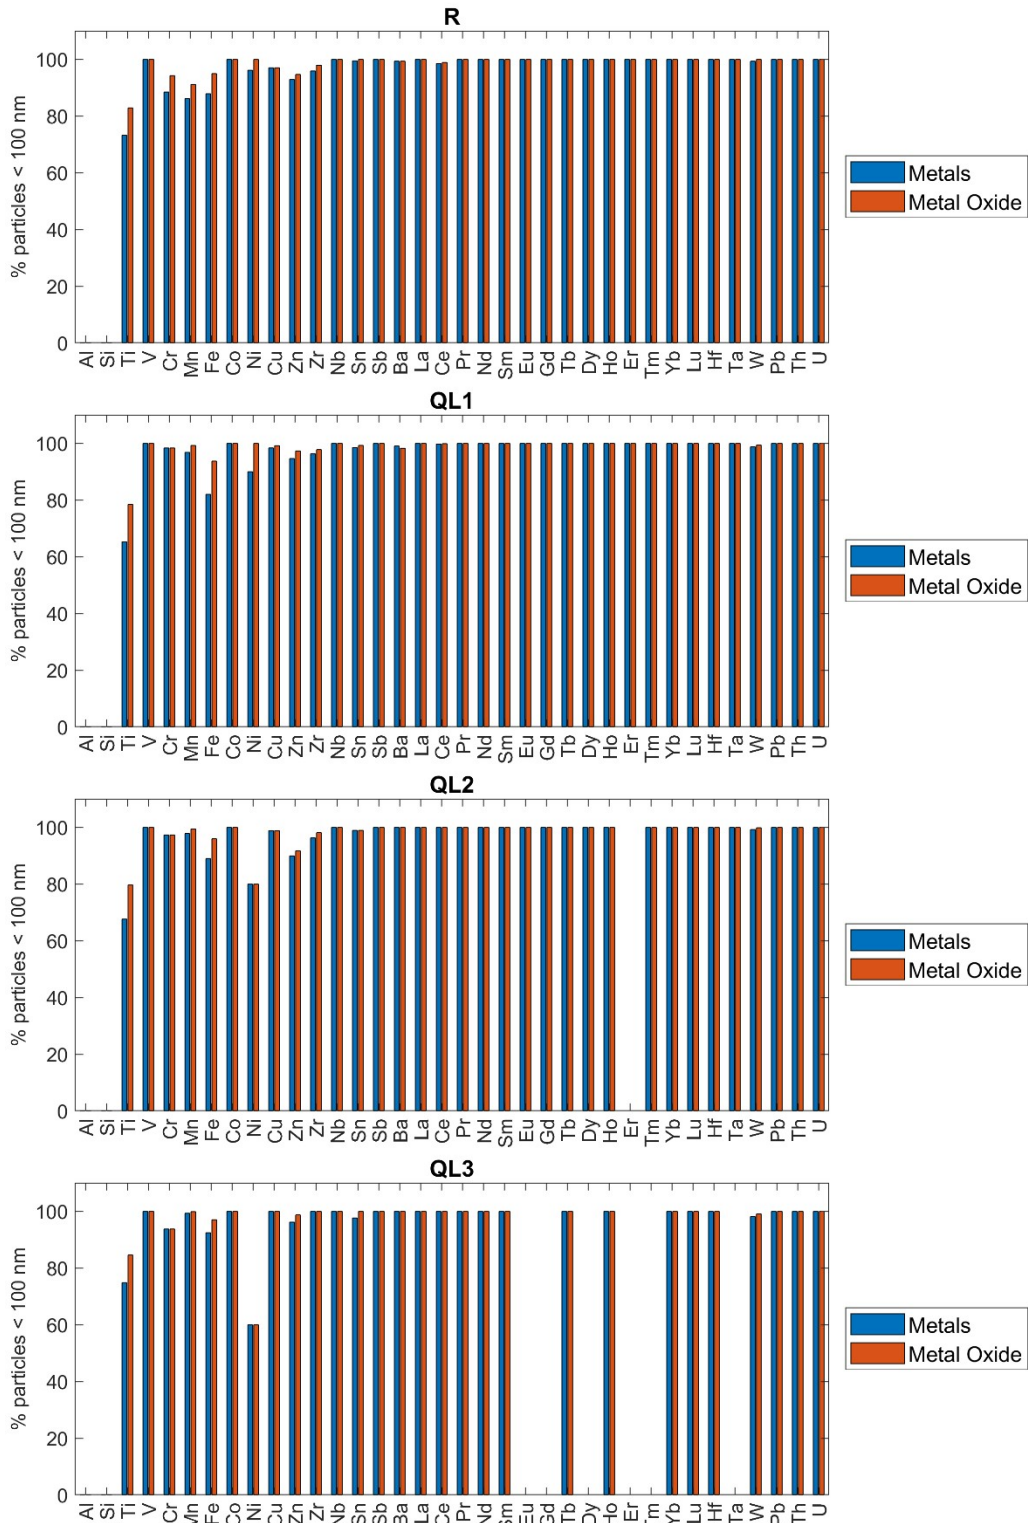

**Figure S10.** Percentage of particles within the nanosize range assuming pure metal and metal oxide composition (see Table S4) in representative samples of Quail Lane rain and runoff. R refer to rain sample and QL1, 2, and 3 refer to Quail Lane bridge runoff samples number 1, 2, and 3, which were collected in the first hour of storm event.



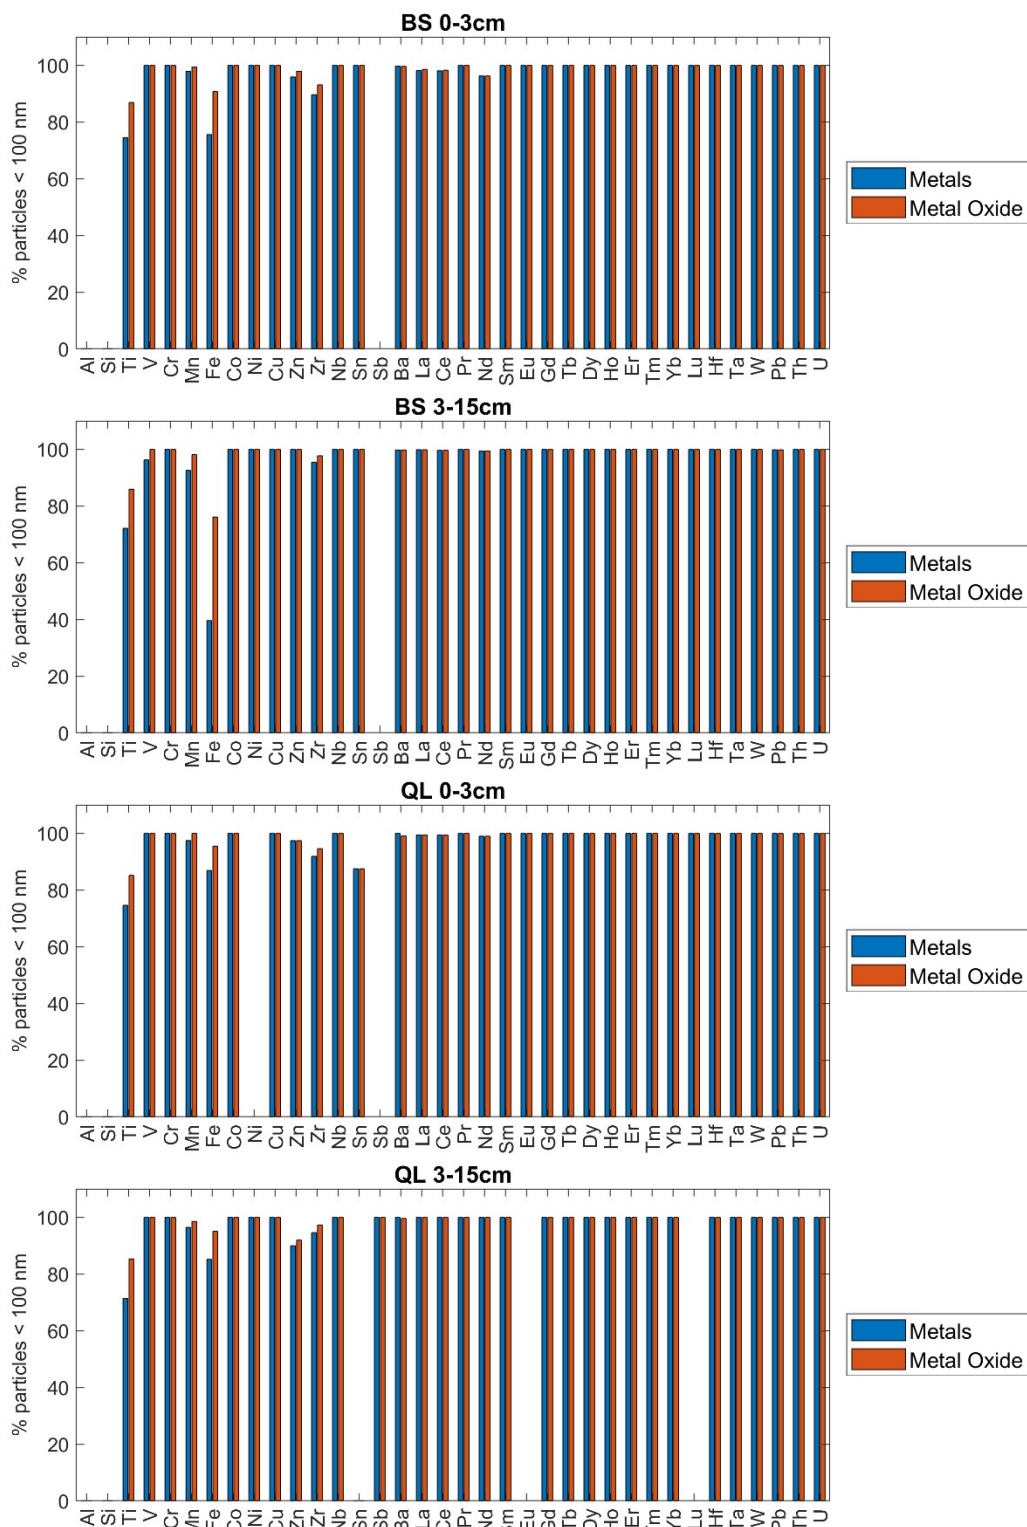

**Figure S11.** Percentage of particles within the nanosize range assuming pure metal and metal oxide composition (see Table S4) in soil samples collected at Blossom Street and Quail Lane. BS: Blossom Street, QL: Quail Lane, 0-3 cm and 3-15 cm refer to soil sampling depth.

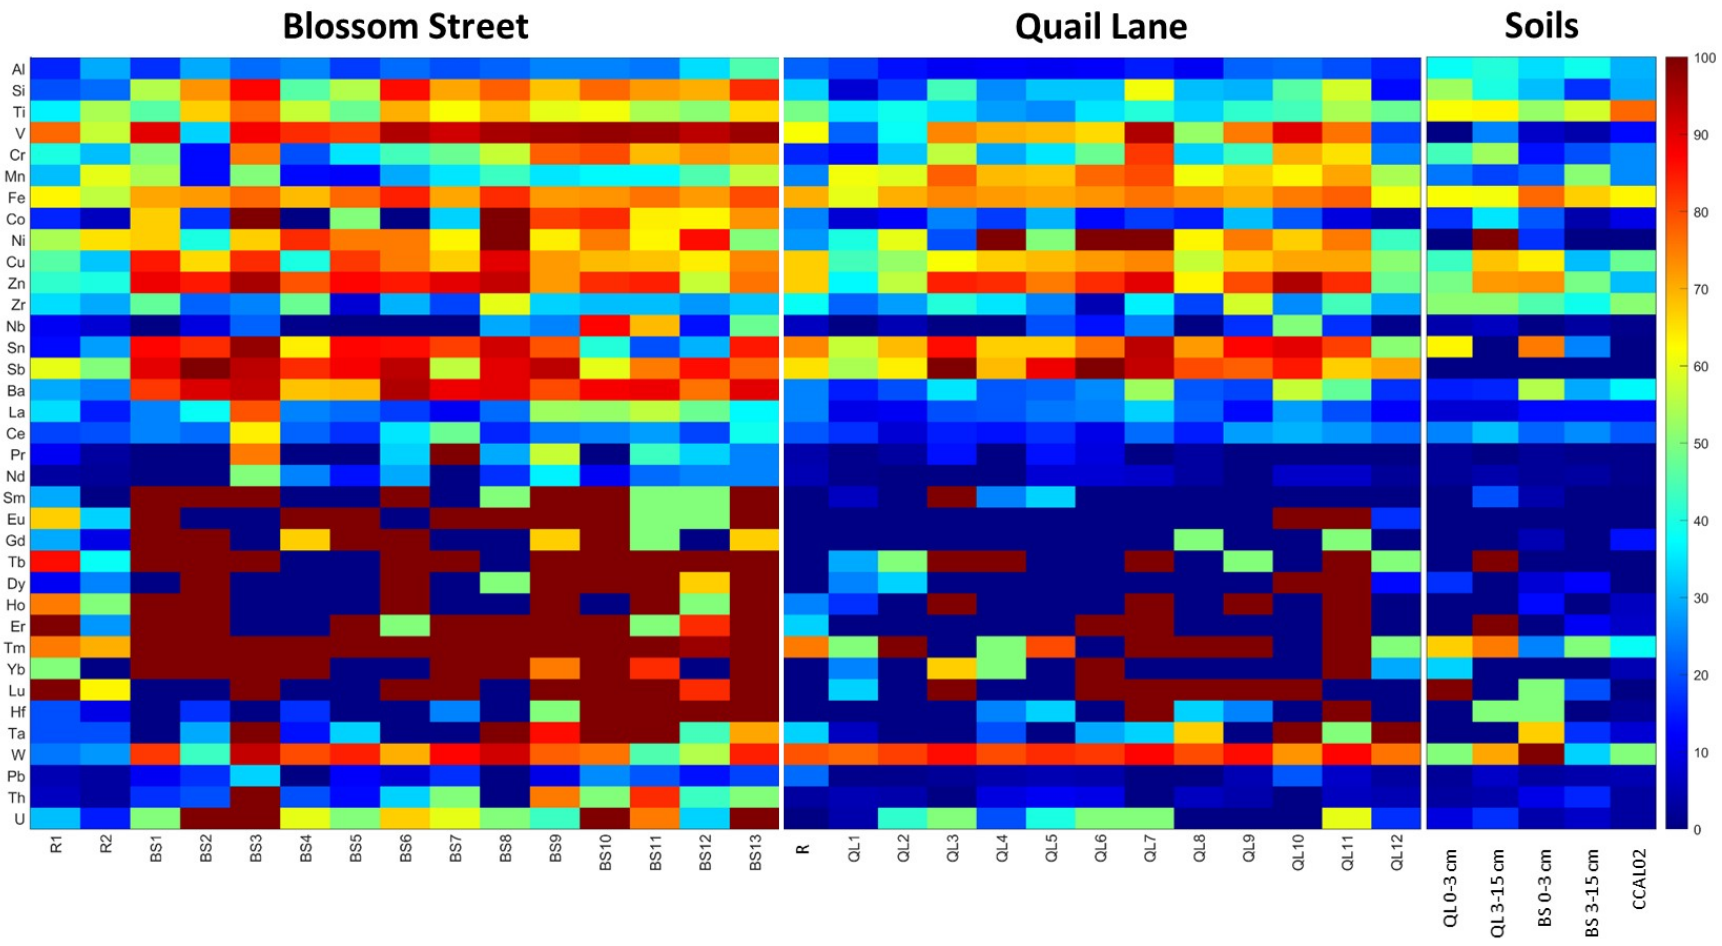

**Figure S12.** Heat map of the relative abundance of single metal nanomaterials (smNMs) detected in rainwater, urban runoff, and soil samples collected at the sample collection site as reference materials.

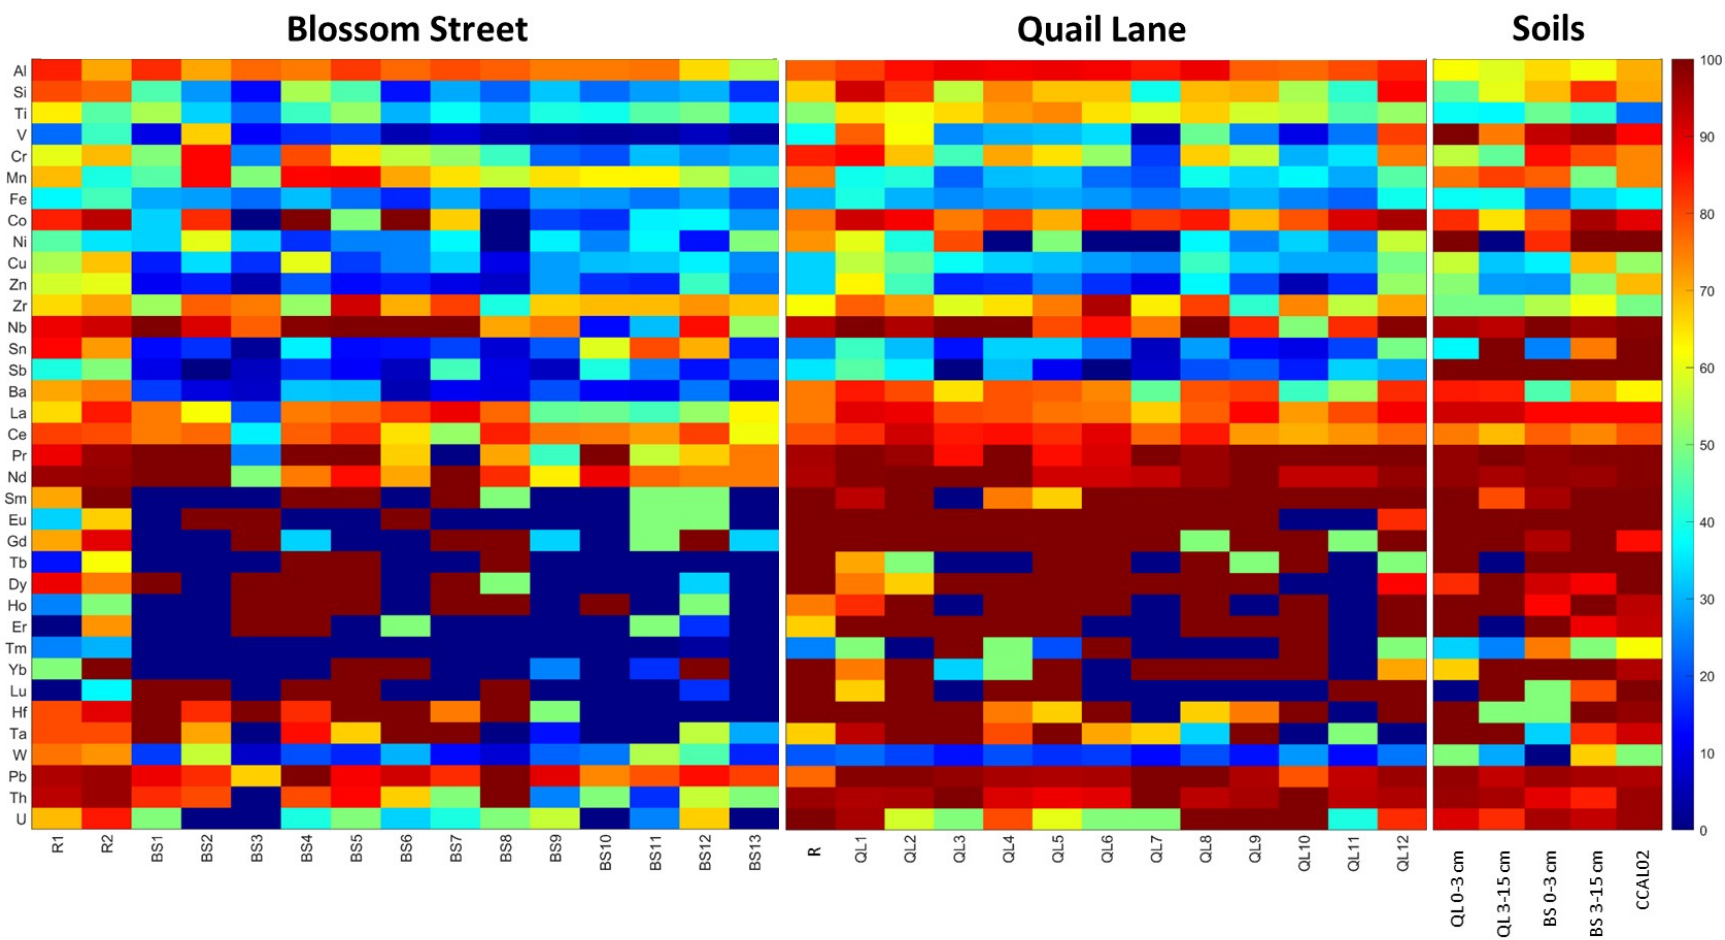

**Figure S13.** Heat map of the relative abundance of multi-metal NMs (mmNMs) detected in rainwater, runoff, and soil samples collected at the sample collection site as reference materials.





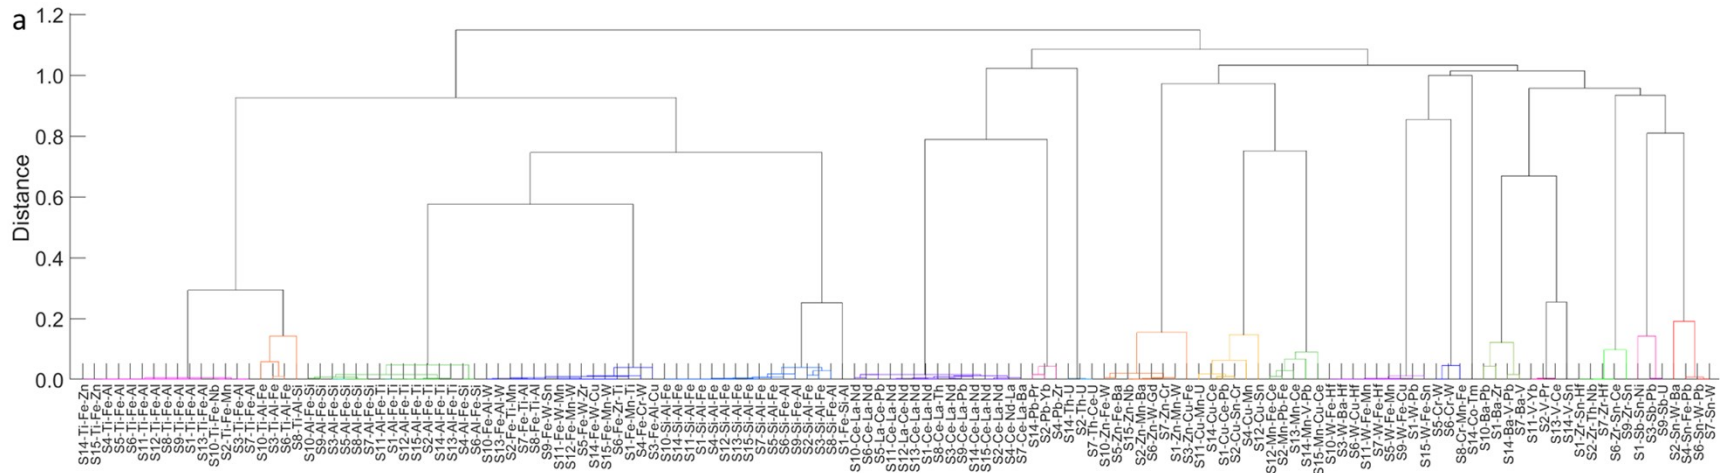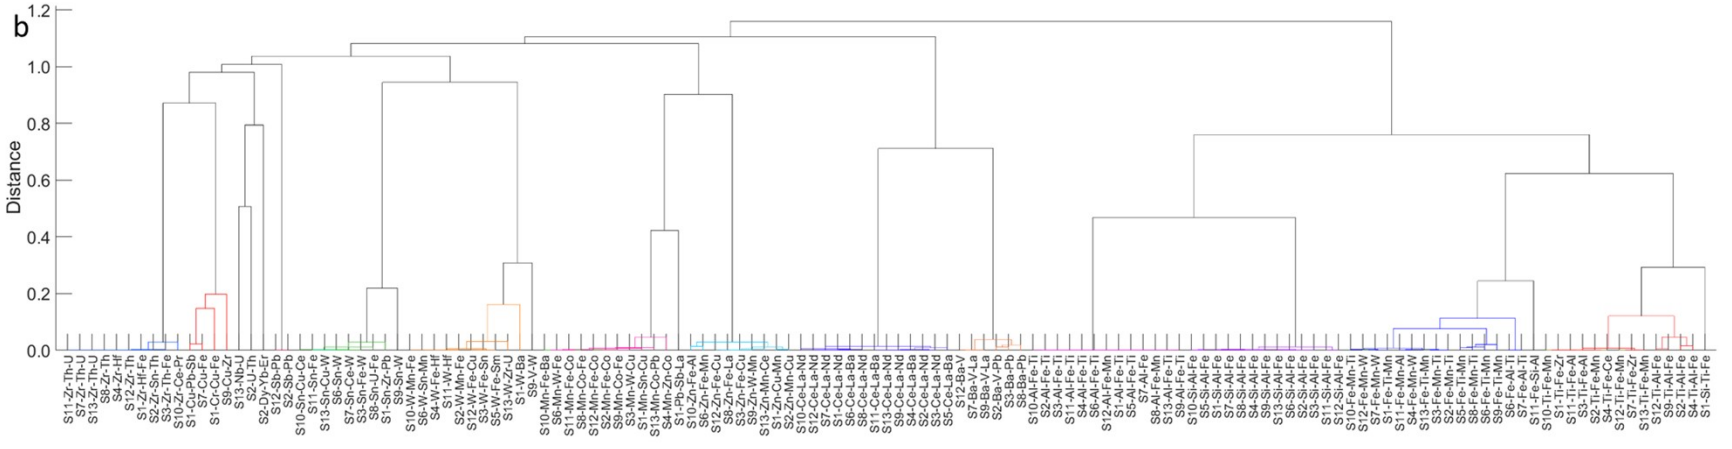

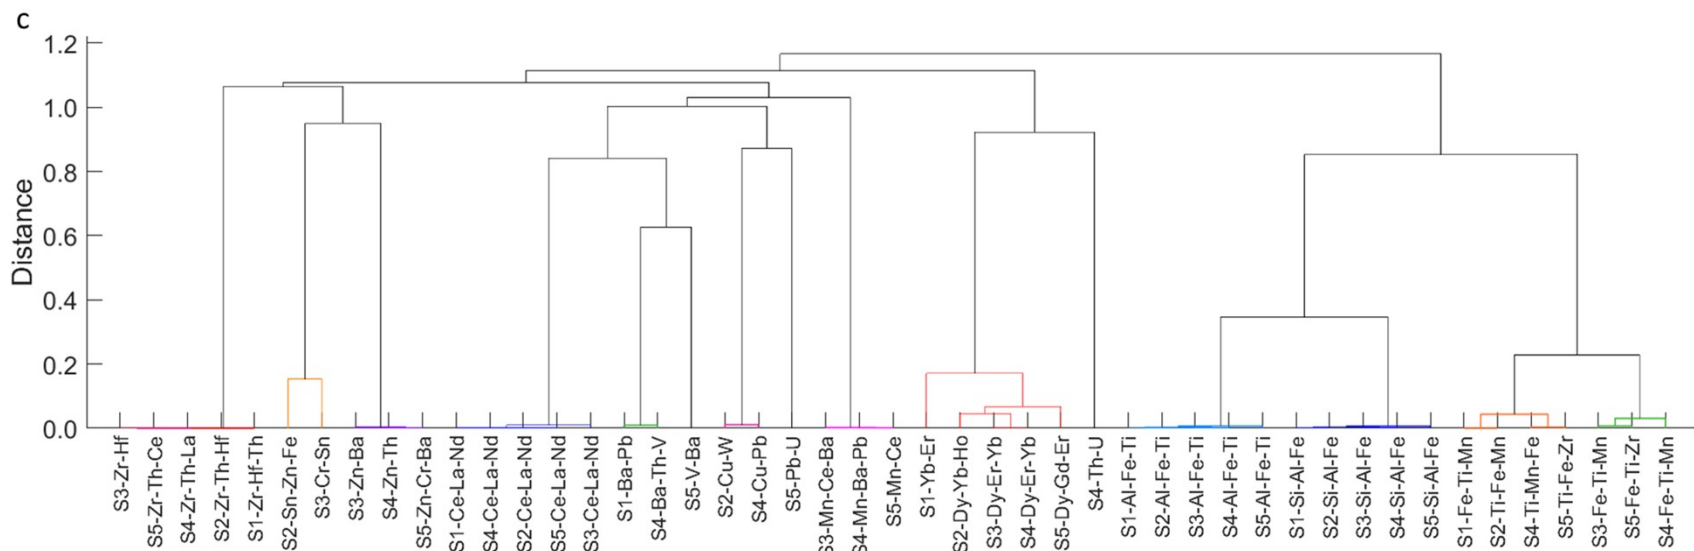

**Figure S15.** Dendrograms of second stage clustering multi-metal nanomaterials (mmNMs) in (a) Blossom Street rain and runoff, (b) Quail Lane rain and runoff, and (c) soils.

Blossom Street

Quai Lane

Soils

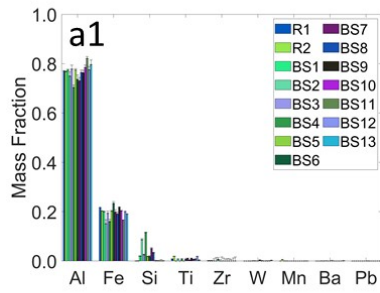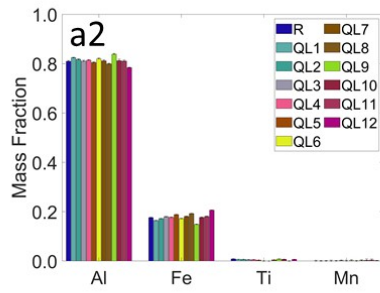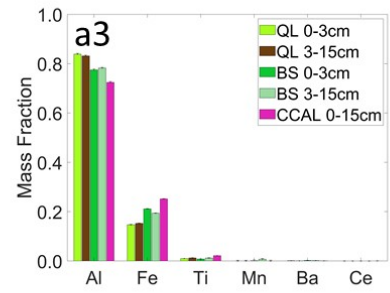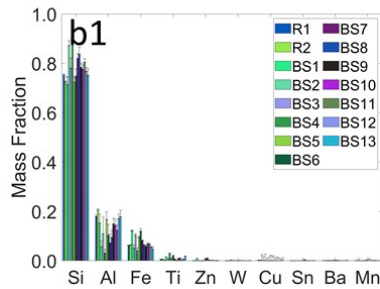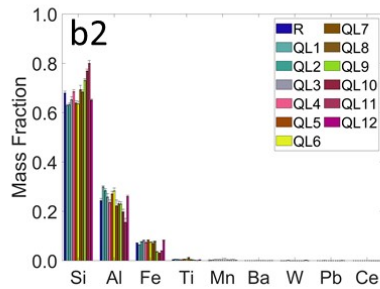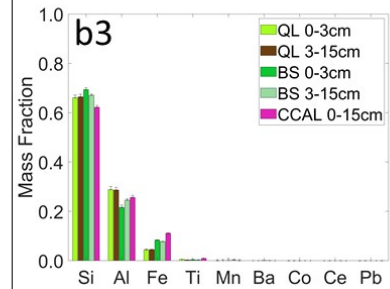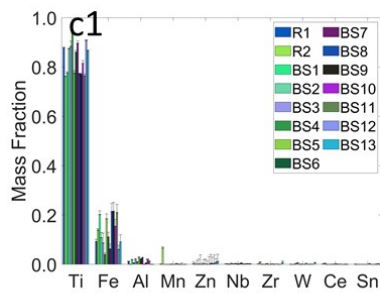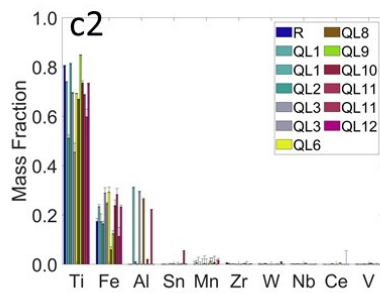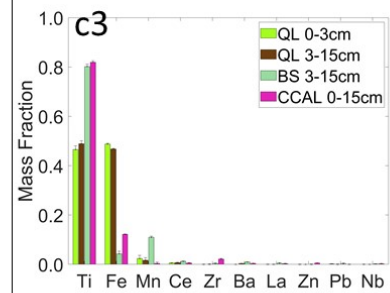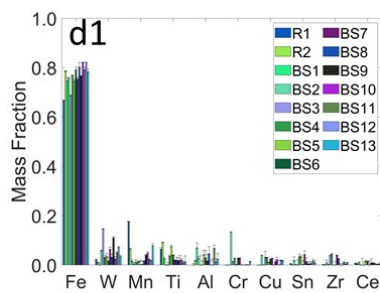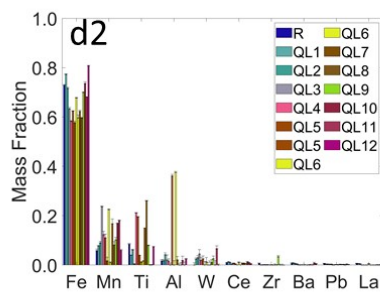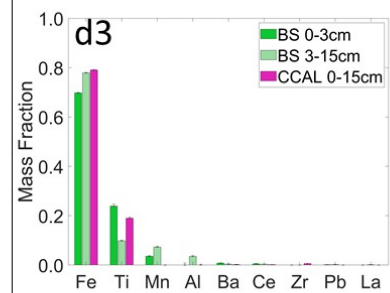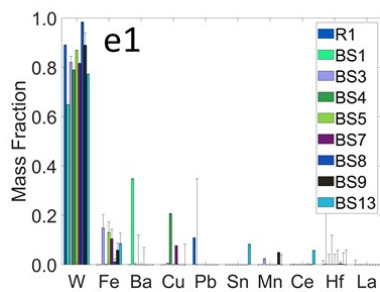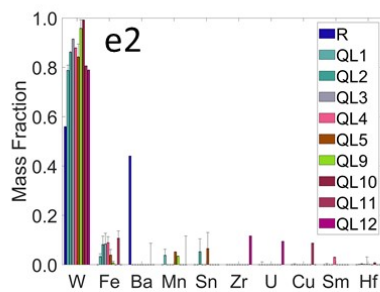



Blossom Street

Quail Lane

Soils

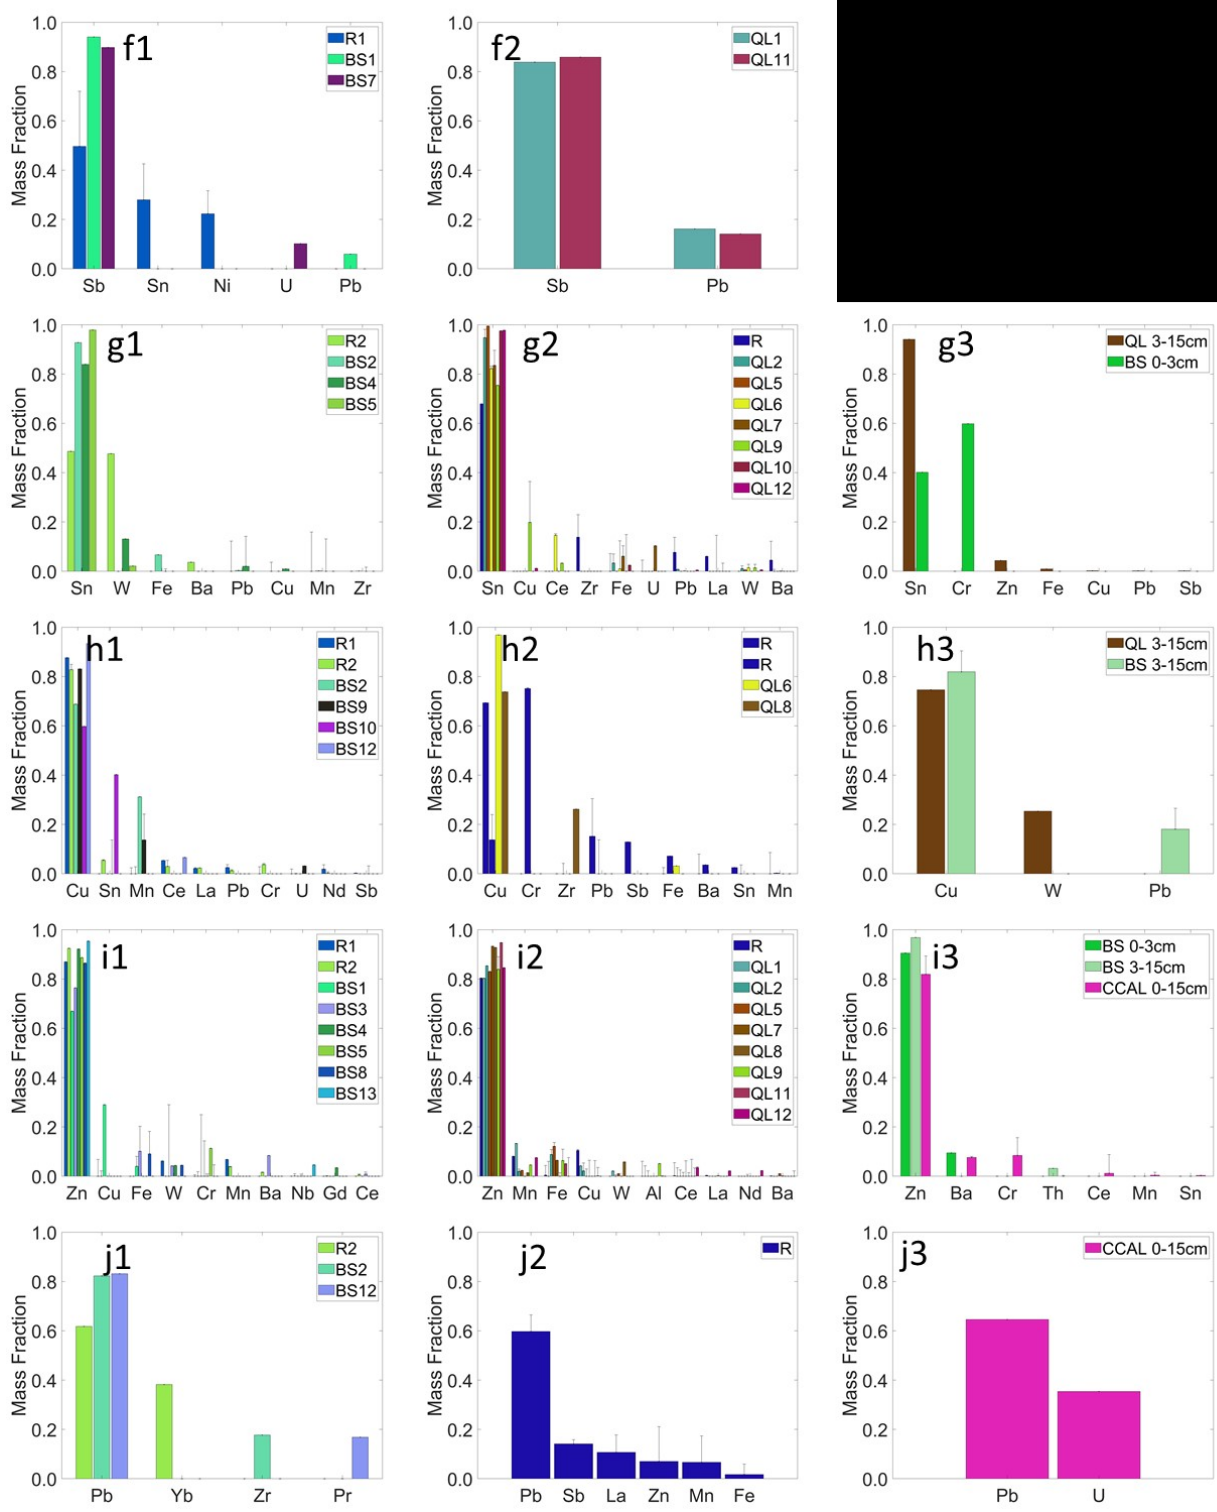

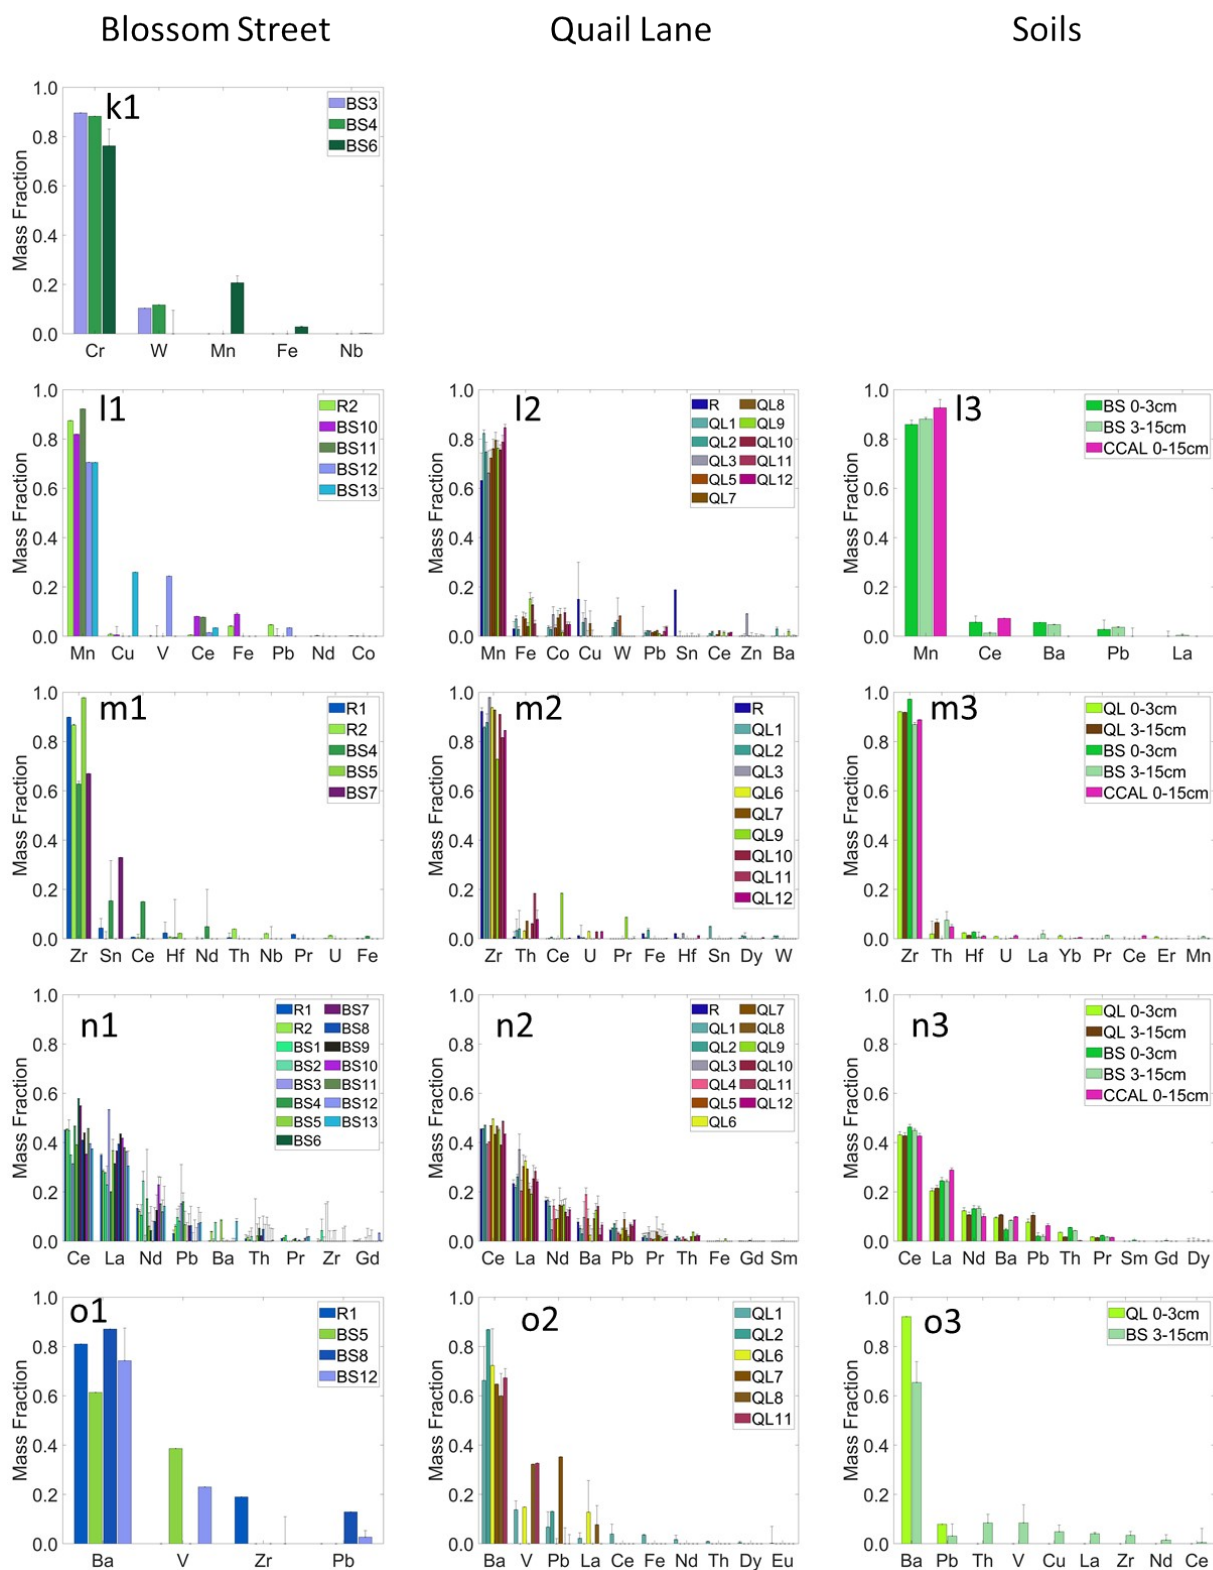

**Figure S16.** Elemental composition (mass fraction) of clusters identified in the rainwater, urban runoff, and soil samples: (a) Al, (b) Si, (c) Ti, (d) Fe, (e) W, (f) Sb, (g) Sn, (h) Cu, (i) Zn, (j) Pb, (k) Cr, (l) Mn, (m) Zr, (n) Ce, and (o) Ba. Distance cutoff for the first and second stage clustering were 0.5 and 0.2, respectively.

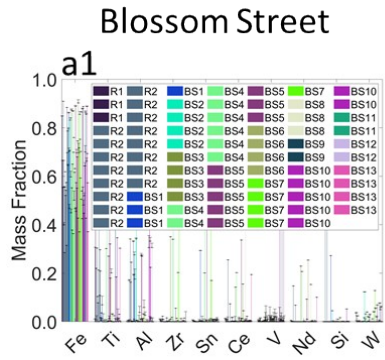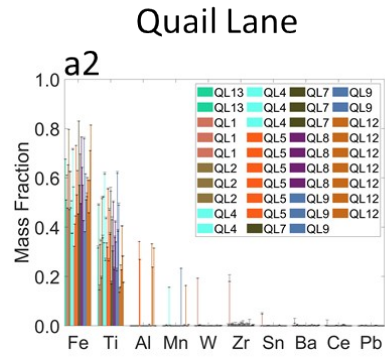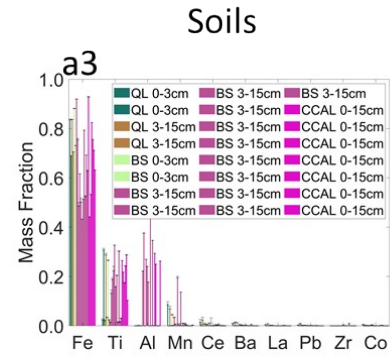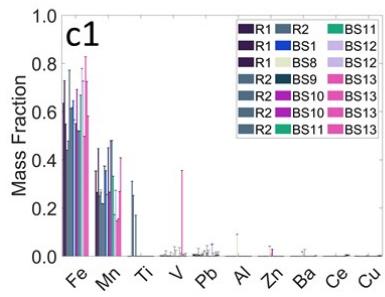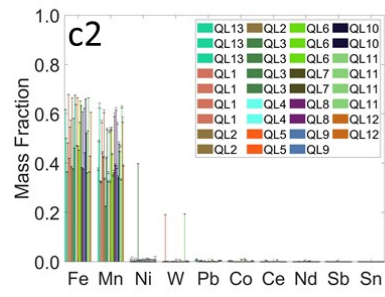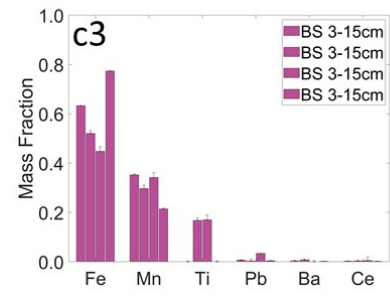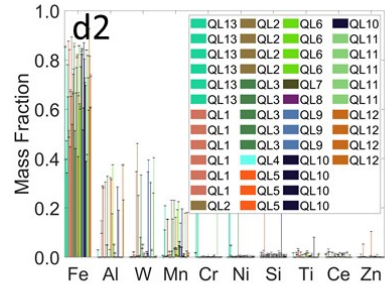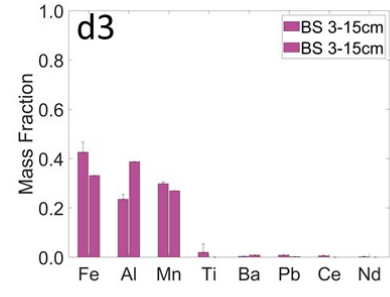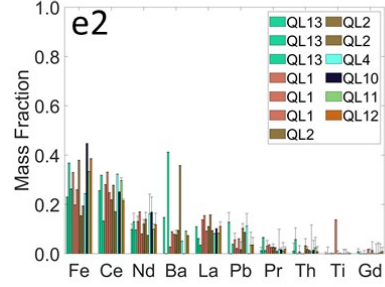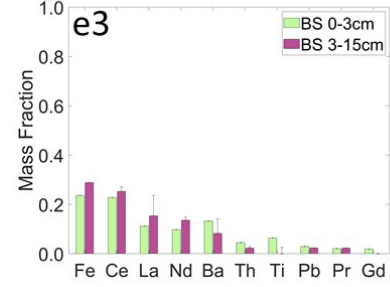

### Blossom Street

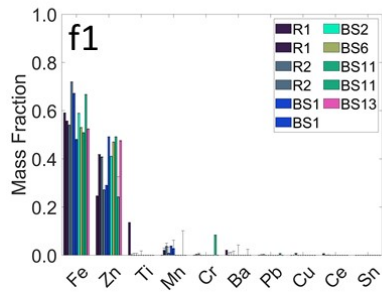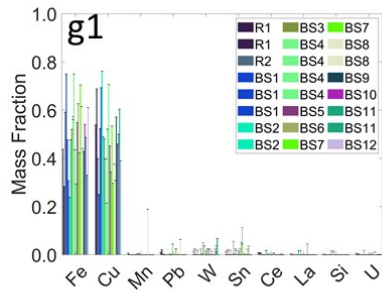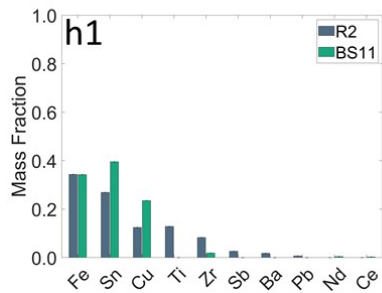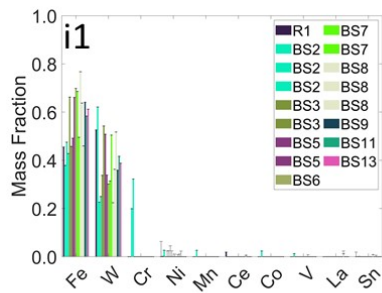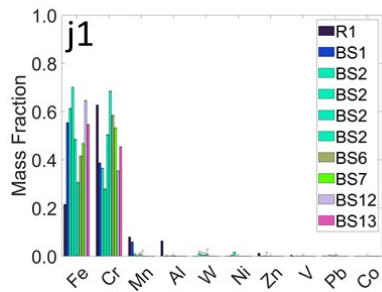

### Quail Lane

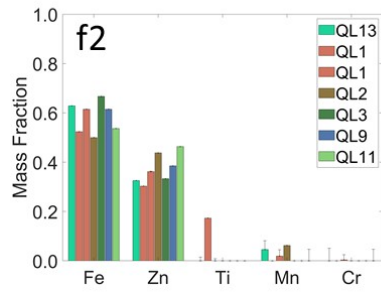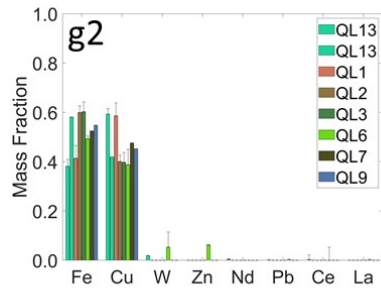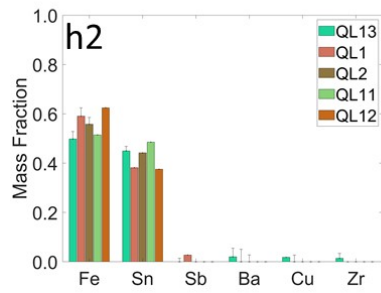

### Soils

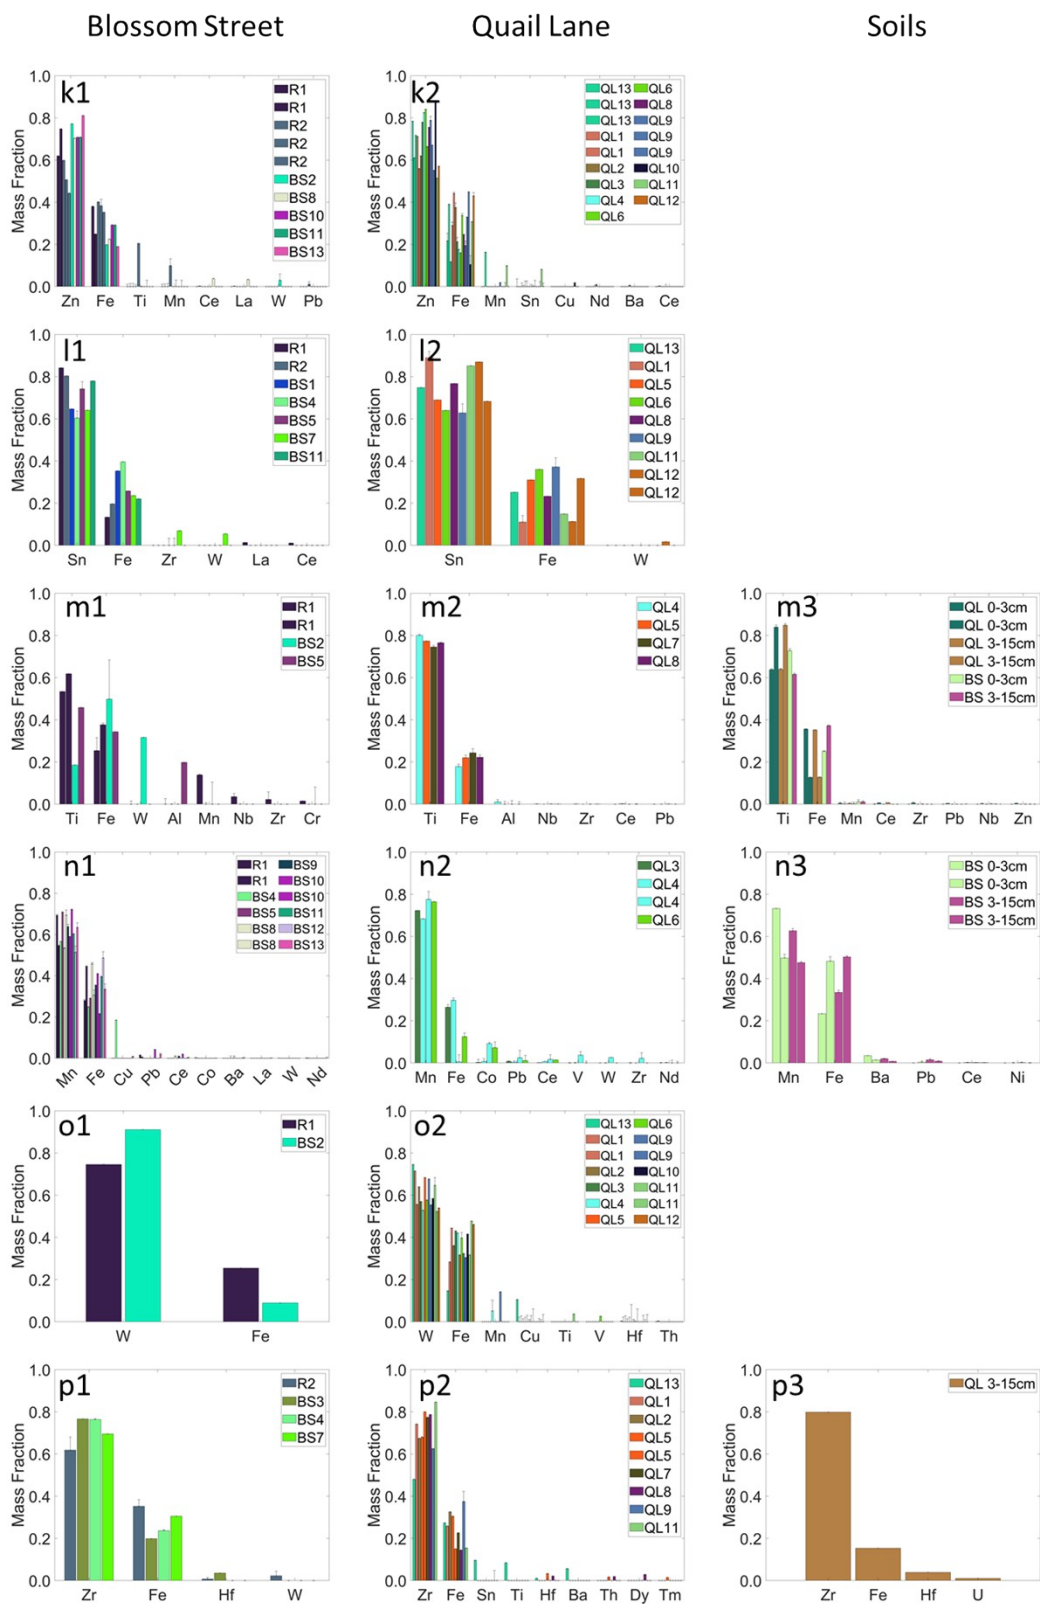

**Figure S17.** Elemental composition (mass fraction) of the identified sub-clusters in the Fe-cluster in rainwater, urban runoff, and soil samples. Distance cutoff for the first and second stage clustering were 0.05 and 0.2, respectively.

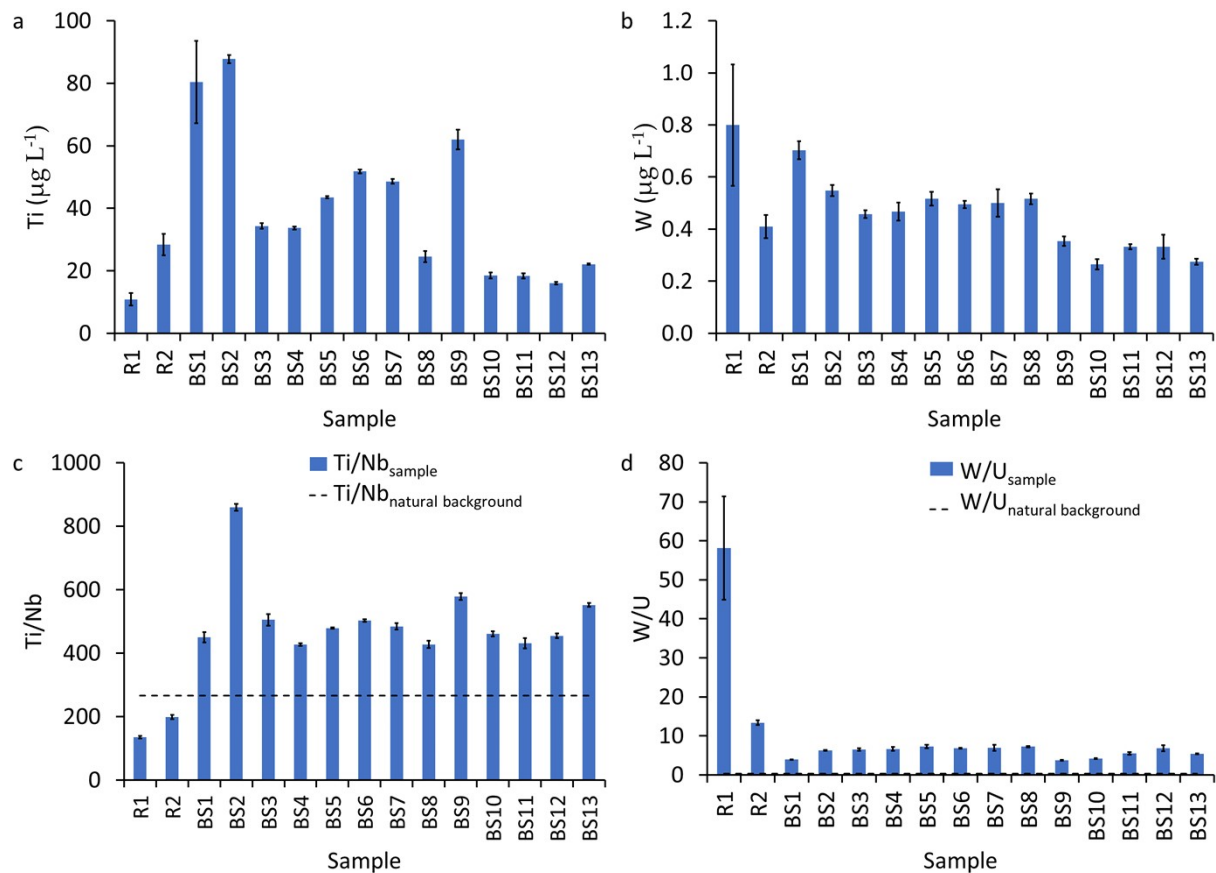

**Figure S18.** Total elemental concentrations of (a) Ti, and (b) W and elemental ratios of (c) Ti/Nb and (d) W/U in Blossom Street rainwater and bridge runoff as a function of sampling time after the start of the storm event. The background Ti/Nb and W/U were  $266 \pm 9$  and  $0.26 \pm 0.17$ , respectively. Data for Quail Lane is presented in Figure S15.

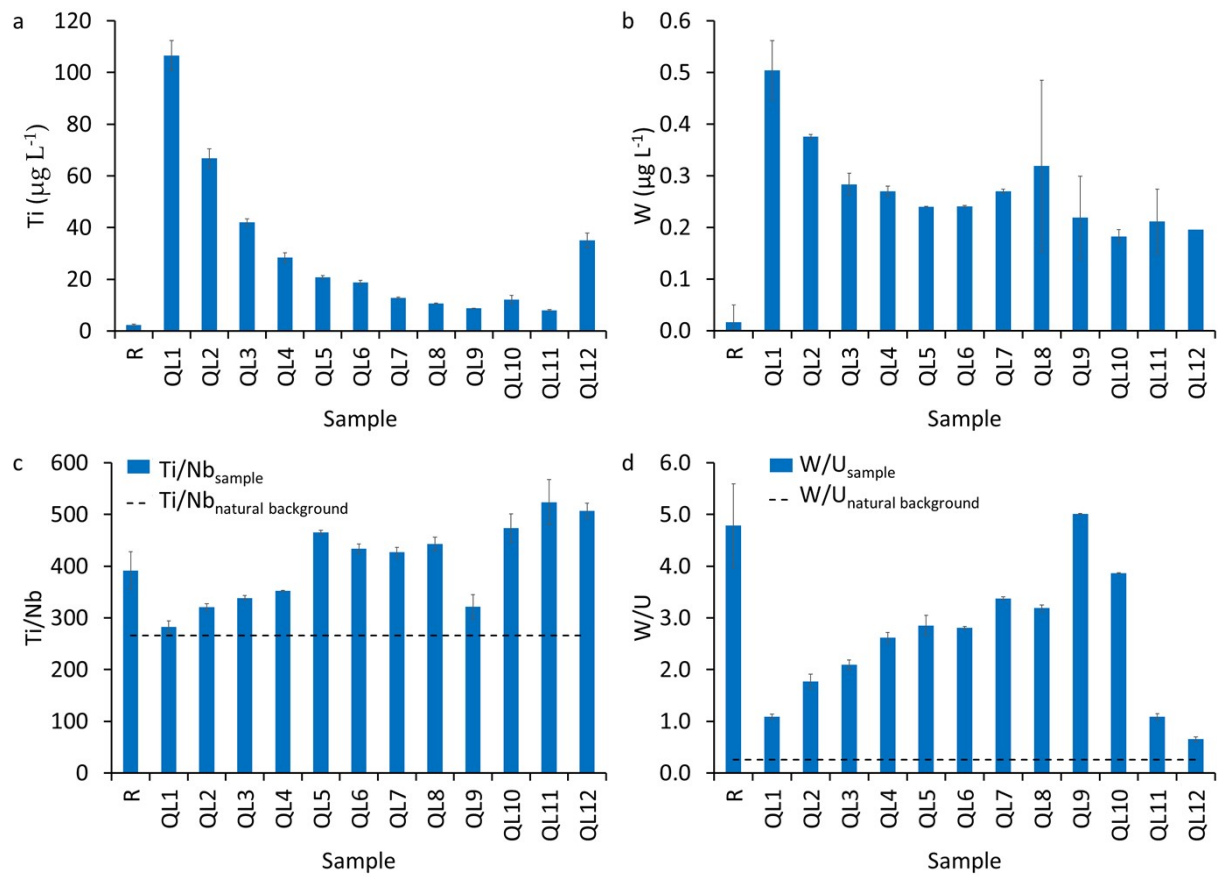

**Figure S19.** Total elemental concentrations of (a) Ti, and (b) W and elemental ratios of (c) Ti/Nb and (d) W/U in Quail Bridge Lane rainwater and runoff as a function of sampling time after the start of the storm event.

1. Loosli, F.; Wang, J.; Rothenberg, S.; Bizimis, M.; Winkler, C.; Borovinskaya, O.; Flamigni, L.; Baalousha, M., Sewage spills are a major source of titanium dioxide engineered (nano)-particle release into the environment. *Environmental Science: Nano* **2019**, *6*, (3), 763-777.
2. Baalousha, M.; Wang, J.; Nabi, M. M.; Loosli, F.; Valenca, R.; Mohanty, S. K.; Afrooz, N.; Cantando, E.; Aich, N., Stormwater green infrastructures retain high concentrations of TiO<sub>2</sub> engineered (nano)-particles. *Journal of hazardous materials* **2020**, *392*, 122335.
3. Nabi, M. M.; Wang, J.; Meyer, M.; Croteau, M.-N.; Ismail, N.; Baalousha, M., Concentrations and size distribution of TiO<sub>2</sub> and Ag engineered particles in five wastewater treatment plants in the United States. *Science of The Total Environment* **2021**, *753*, 142017.
4. Nabi, M. M.; Wang, J.; Baalousha, M., Episodic surges in titanium dioxide engineered particle concentrations in surface waters following rainfall events. *Chemosphere* **2021**, *263*, 128261.
5. Smith, D. B. C.; Woodruff, W. F.; Solano, L. G.; Ellefsen, F.; Karl, J., Geochemical and mineralogical maps for soils of the conterminous United States. **2014**.
